1 Genome-wide analysis of experimentally evolved *Candida auris* reveals multiple novel  
2 mechanisms of multidrug-resistance.

3  
4 Hans Carolus<sup>a,b</sup>, Siebe Pierson<sup>b</sup>, José F. Muñoz<sup>c</sup>, Ana Subotić<sup>a,b</sup>, Rita B. Cruz<sup>b</sup>, Christina A.  
5 Cuomo<sup>c</sup>, Patrick Van Dijck<sup>a,b,#</sup>

6 <sup>a</sup> VIB Center for Microbiology, Leuven, Belgium

7 <sup>b</sup> Department of Biology, KU Leuven, Leuven, Belgium

8 <sup>c</sup> Broad Institute of MIT and Harvard, Cambridge, MA, USA

9 # Address correspondence to Patrick Van Dijck, [patrick.vandijck@kuleuven.vib.be](mailto:patrick.vandijck@kuleuven.vib.be)

10

11 **Running head:** Experimental evolution of multidrug-resistance in *C. auris*

12 **Keywords:** *Candida auris*, multidrug-resistance, micro-evolution, whole genome sequencing

### 13 **Abstract**

14 *Candida auris* is globally recognized as an opportunistic fungal pathogen of high concern, due  
15 to its extensive multidrug-resistance (MDR). Still, molecular mechanisms of MDR are largely  
16 unexplored. This is the first account of genome wide evolution of MDR in *C. auris* obtained  
17 through serial *in vitro* exposure to azoles, polyenes and echinocandins. We show the stepwise  
18 accumulation of multiple novel mutations in genes known and unknown in antifungal drug  
19 resistance, albeit almost all new for *C. auris*. Echinocandin resistance evolved through a codon  
20 deletion in *FKSI* accompanied by a substitution in *FKSI* hot spot 3. Mutations in *ERG3* and  
21 *CIS2* further increased the echinocandin MIC. Decreased azole susceptibility was acquired  
22 through a gain of function mutation in transcription factor *TAC1b* yielding overexpression of  
23 the drug efflux pump Cdr1; a segmental duplication of chromosome 1 containing *ERG11*; and  
24 a whole chromosome 5 duplication, which contains *TAC1b*. The latter was associated with  
25 increased expression of *ERG11*, *TAC1b* and *CDR2*, but not *CDR1*. The simultaneous  
26 emergence of nonsense mutations in *ERG3* and *ERG11*, presumably leading to the abrogation  
27 of ergosterol synthesis, was shown to decrease amphotericin B susceptibility, accompanied  
28 with fluconazole cross resistance. A mutation in *MEC3*, a gene mainly known for its role in  
29 DNA damage homeostasis, further increased the polyene MIC. Overall, this study shows the  
30 alarming potential and diversity for MDR development in *C. auris*, even in a clade until now  
31 not associated with MDR (clade II), hereby stressing its clinical importance and the urge for  
32 future research.

### 33 **Importance**

34 *C. auris* is a recently discovered human fungal pathogens and has shown an alarming potential  
35 for multi- and pan-resistance towards all classes of antifungals most commonly used in the  
36 clinic. Currently, *C. auris* has been globally recognized as a nosocomial pathogen of high  
37 concern due to this evolutionary potential. So far, this is the first study in which the stepwise  
38 progression of MDR in *C. auris* is monitored *in vitro*. Multiple novel mutations in known  
39 ‘resistance genes’ and genes previously not or vaguely associated with drug resistance reveal  
40 rapid MDR evolution in a *C. auris* clade II isolate. Additionally, this study shows that *in vitro*  
41 experimental evolution can be a powerful tool to discover new drug resistance mechanisms,  
42 although it has its limitations.

### 43 **Introduction**

44 Over the course of a decade since its discovery (1), *Candida auris* has emerged in at least 39  
45 countries along every inhabited continent (2), occasionally causing healthcare-associated  
46 outbreaks of lethal candidiasis (3). *C. auris* is substantially different from any other *Candida*  
47 species studied so far, as it behaves like a true multidrug-resistant (MDR) nosocomial pathogen  
48 (cfr. methicillin resistant *Staphylococcus aureus*, MRSA) (3). This was illustrated by the US  
49 Center for Disease Control and Prevention (CDC) in 2019, as they listed *C. auris* as the first  
50 fungus among urgent antimicrobial resistance threats (4). *C. auris* can become resistant to each  
51 drug and each combination of drugs from the three major antifungal drug classes: the azoles  
52 (e.g. fluconazole), echinocandins (e.g. caspofungin) and polyenes (e.g. amphotericin B).  
53 Various clinical isolate screening reports indicate fluconazole resistance in over 80% (5-9) and  
54 amphotericin B resistance in up to 30% of the isolates tested (6, 7). Echinocandin resistance is  
55 less common, found in 2-10% in some screenings (6-8, 10), but it is alarmingly on the rise (11,  
56 12). Overall, about 90% of the *C. auris* isolates are estimated to have acquired resistance to at  
57 least one drug, while 30-41% are resistant to two drugs, and roughly 4% are pan-resistant  
58 (resistance to the three major antifungal drug classes) (4, 7). These numbers show an  
59 unprecedented potential to acquire MDR, unlike any other pathogenic *Candida* species (3, 12,  
60 13). The molecular mechanisms of antifungal drug resistance, especially for amphotericin B  
61 resistance and MDR, are still poorly understood in *C. auris*. Hundreds of resistant *C. auris*  
62 strains have been sequenced and their decreased drug susceptibility for azoles and  
63 echinocandins has been associated with a handful of mutations in genes known to be involved  
64 in drug resistance. Still, the high levels of resistance and extensive MDR in some strains cannot

65 be explained through the limited number of resistance-conferring mutations described so far  
66 (3, 7).

67 Azole resistance has been linked to three single nucleotide polymorphisms (SNPs) (7-9, 14)  
68 and an increased copy number (9, 15) of *ERG11*, the gene encoding the fluconazole target  
69 lanosterol 14- $\alpha$ -demethylase. Additionally, the ATP Binding Cassette (ABC) transporter Cdr1,  
70 was proven to act as an efflux pump of azoles in *C. auris* (16-18) and a recent study suggests  
71 that gain of function (GOF) mutations in *TAC1b* can underly this mode of action (16).  
72 Echinocandin resistance in *C. auris* was previously only linked to SNPs substituting amino  
73 acid S639 (9, 12, 19) and F635 (20) of Fks1, which is the echinocandin target:  $\beta$ (1,3) D-glucan  
74 synthase. The polyene amphotericin B works by sequestering ergosterol, rather than inhibiting  
75 a specific enzyme and therefore, amphotericin B resistance is among the least understood drug  
76 resistance mechanisms in *C. auris* and *Candida* sp. in general (12). So far, only an increased  
77 expression of genes involved in ergosterol biosynthesis (i.e. *ERG1*, *ERG2*, *ERG6* and *ERG16*)  
78 (15), SNPs in the gene encoding the transcription factor Flo8 and an unnamed membrane  
79 transporter encoding gene (21), had been linked to amphotericin B resistance in *C. auris* (12,  
80 19). Overall, few studies have actually been able to validate the proposed drug resistance  
81 mechanisms in *C. auris* (16, 18, 22, 23), presumably because of the lack of an optimized gene-  
82 editing system for *C. auris*.

83 Here, we circumvent challenging and laborious gene-editing in *C. auris* (16, 22, 24) through a  
84 strategy of serial transfer based experimental evolution with the ability to trace back the  
85 emergence - and validate the causality - of single mutations or copy number changes  
86 throughout the evolutionary process. By designing allele specific PCR primers, the presence  
87 or absence of specific mutations could easily be screened for by PCR on multiple single clones  
88 in the daily evolving populations. Doing so, we validated 10 non-synonymous mutations in  
89 eight genes, evolved in 5 separate evolutionary lineages. When drug resistance became  
90 apparent, single clones from each lineage were whole genome sequenced and the SNPs,  
91 insertions/deletions (Indels) and copy number variants (CNVs) discovered were validated.

92 In this study we investigated MDR evolution in a clade II *C. auris* strain, which is understudied  
93 compared to other clades (25) and has been suggested to be less prone to drug resistance  
94 development (25, 26). Previously, five different clades (clade I -V, i.e. the South Asian, East  
95 Asian, African, South American and Iranian clade resp.) of *C. auris* have been identified, each  
96 separated by thousands of SNPs (7, 27), and often associated with clade-specific virulence  
97 and/or drug resistance tendencies (9, 25, 26). As such, this study shows that clade II *C. auris*

98 can also rapidly acquire MDR *in vitro* and its mechanisms of resistance provide fundamental  
99 knowledge on how resistance can be acquired by *C. auris*. Finally, our study presents both the  
100 power and challenges of using *in vitro* experimental evolution to discover the molecular  
101 mechanisms of (multi)drug-resistance.

## 102 **Results**

103 ***C. auris* clade II can acquire multidrug-resistance rapidly *in vitro*.** *C. auris* strain B11220,  
104 the original type strain described by Satoh *et al.* (1) in Japan 2009, was the only strain used for  
105 this study. A single colony isolate from strain B11220 (further referred to as wild type, wt),  
106 was subjected to an *in vitro* experimental micro-evolution assay as depicted and described in  
107 **figure 1A** and the methods section respectively. The wild type strain proved to be pan-  
108 susceptible (determined by minimum inhibitory concentration or MIC<sub>50</sub>, see method section)  
109 to the three major antifungal drug classes: fluconazole MIC<sub>50</sub>: 1µg/ml, caspofungin MIC<sub>50</sub>:  
110 0.125µg/ml and amphotericin B MIC<sub>50</sub>: 0.5µg/ml. Based on these MIC<sub>50</sub> values, the wild type  
111 strain was exposed (in triplicate) to three concentrations of each drug: 2xMIC<sub>50</sub>, 1xMIC<sub>50</sub> and  
112 0.5xMIC<sub>50</sub> or no drug, representing three selective pressures and a control, respectively. Serial  
113 transfer with conditional drug treatment (**figure 1A**) was maintained for 30 days or until drug  
114 resistance became evident from regular MIC testing. An overview of the ancestry of the  
115 evolved strains is depicted in **figure 1B**.

116 Five strains were evolved and sequenced: F30, C20, A29, FC17 and CF16: strain B11220 (wild  
117 type) was exposed to **F**luconazole (**F**-lineage), **C**aspofungin (**C**-lineage) and **A**mphotericin B  
118 (**A**-lineage), after which the single resistant strains obtained were exposed to a second drug to  
119 acquire multidrug-resistance, yielding the **FC**- and **CF**-lineage for the **F** (**F**luconazole resistant)  
120 strain that was given **C**aspofungin and the **C** (**C**aspofungin resistant) strain that was given  
121 **F**luconazole respectively. The name of each strain represents the experimental lineage (letter  
122 which refers to the treatment/resistance), and day of isolation (number), respectively. **Figure 2**  
123 shows the MIC<sub>50</sub> values for each drug and each end-point strain (F30, C20, A29, FC17 and  
124 CF16) evolved. The length of the evolution experiment ranged from 16 (CF-lineage) to 30 days  
125 (F-lineage), although later it was shown that resistant clones emerged quite early (e.g. after  
126 three days in C-lineage, see **figure 2**).

127

128 **Allele-specific PCR is an effective method for tracing back the emergence of mutations**  
129 **during evolution in serial isolates.** After micro-evolution, whole genome sequencing of the  
130 wild type strains and strain F30, C20, A29, FC17 and CF16 showed the acquisition of 10 non-

131 synonymous mutations (listed in **table 1**) and two different aneuploidies (shown in **figure 6**,  
132 validation shown in supplementary **figure S3**). All mutations identified were novel to *C. auris*  
133 based on literature review and comparison of sequences with a set of 304 globally distributed  
134 *C. auris* isolate sequences representing Clade I, II, III and IV (9). The impact of individual  
135 mutations and CNVs will be discussed in the following paragraphs.

136 To validate the causality of single mutations in strains that harbored more than one mutation,  
137 we applied a screening strategy of allele-specific PCR (AS-PCR). AS-PCR primers were  
138 designed as described by Liu *et al.* (28), implementing a specific mismatch at the third position  
139 of the 3' end of the allele-specific primer to increase specificity. An overview of the universal,  
140 and allele specific primers used to perform AS-PCR, is given in supplementary **table S1**. The  
141 specificity and sensitivity of all AS-PCR primers was assessed by performing temperature  
142 gradient PCRs on serial dilution reference DNA template (for one example see supplementary  
143 **figure S2**). Populations were re-cultured from the -80°C collection of daily stored aliquots  
144 (populations) and AS-PCR was performed on gDNA extracted from a maximum of 30 single  
145 clones of each (daily) population. After confirmation of the emergence of a mutation of interest,  
146 alleles were verified by sequencing a +-1000 bp region spanning the allele of interest. Primers  
147 used for PCR and sequencing are given in supplementary **table S1**. Next, the influence of this  
148 single mutation on the drug susceptibility was determined by performing a broth dilution assay  
149 (BDA, see Antifungal susceptibility testing in method section). **Figure 2** shows the impact of  
150 each individual mutation on the MIC for the drug of interest for each lineage evolved, except  
151 for the A-lineage, in which the mutations in *ERG3* and *ERG11* (**table 1**) was present or absent  
152 simultaneously in the 30 clones that were checked per population.

153  
154 **Novel mutations in *FKSI* and *ERG3* yield extensive echinocandin resistance with minor**  
155 **growth discrepancies.** Caspofungin resistance was evolved twice in this study, once as  
156 monoresistance in the C-lineage, and once as multidrug-resistance in the FC-lineage, derived  
157 from the fluconazole resistant strain F30 (**figure 1B**). The susceptibility to caspofungin  
158 decreased drastically in both strain C20 and FC17 (MIC<sub>50</sub> >64µg/ml) (**figure 2**). Whole  
159 genome sequencing revealed three mutations in the C20 strain: a missense mutation  
160 (atG/atA|M690I) and codon deletion (ttcttg/ttg|FL635L) in *FKSI* (B9J08\_000964; **table 1**), the  
161 gene encoding the catalytic subunit of the echinocandin drug target β(1,3) D-glucan synthase,  
162 and one missense mutation (Cta/Ata|L207I) in *ERG3*, encoding sterol Δ<sup>5,6</sup>-desaturase  
163 (B9J08\_003737; **table 1**). The exact same codon deletion (ttcttg/ttg|FL635L) in *FKSI* emerged

164 independently during caspofungin resistance evolution in the FC-lineage (**table 1**). Two  
165 additional mutations emerged during the evolution of strain FC17, namely a missense mutation  
166 (gAt/gTt|D367V) in the *PEA2* gene, encoding a subunit of the polarisome (B9J08\_001356;  
167 **table 1**), and a missense mutation (Gca/Aca|A27T) in the *CIS2* gene, encoding a  $\gamma$ -  
168 glutamylcysteine synthetase (B9J08\_003232; **table 1**). Tracing back the emergence of these  
169 mutations shows that the *FKS1* mutation FL635L increased the MIC<sub>50</sub> of the wild type strain  
170 500-fold: from 0.125 $\mu$ g/ml to 64 $\mu$ g/ml (**figure 2**). It is however the mutations in *CIS2* (emerged  
171 in FC16) and *ERG3* (present in C20) that further increased the caspofungin MIC<sub>50</sub> to >64 $\mu$ g/ml  
172 (**figure 2**).

173 Acquired echinocandin resistance in fungi has been associated with several specific mutations  
174 in three defined ‘hot spot’ regions (HS) in the *FKS1* gene (29). **Figure 3** shows an amino acid  
175 sequence alignment of the *FKS1* gene HS1, HS2 and HS3 regions, constructed to compare the  
176 mutations found in this study to those known to confer echinocandin resistance in *C. auris* and  
177 other fungi as described in literature. This literature review shows that the codon deletion at  
178 position F635 as found in this study; also has been reported to confer decreased echinocandin  
179 susceptibility in *C. glabrata* (29). The same amino acid was substituted (not deleted as in C-  
180 lineage here) in echinocandin resistant *C. auris* strains reported recently (20). The *FKS1*  
181 mutation M690I is located in hot spot region 3 without comparable mutations in pathogenic  
182 fungi (**figure 3**), and seems to have no direct impact on the drug susceptibility to caspofungin  
183 in the C-lineage (**figure 2**).

184 **Figure 4** shows the growth curves of all end-point evolved strains, plotted based on growth in  
185 RPMI-MOPS medium supplemented with 0,2% or 2% glucose (**figure 4A and 4B**  
186 respectively). From these growth plots, it is clear that caspofungin resistant strains C20 and  
187 FC17 hardly had any growth discrepancies compared to the parent wild type strain under  
188 physiological conditions, showcasing the lack of fitness trade-offs associated with the  
189 acquisition of echinocandin resistance described above.

190

191 **Mutations of *ERG3*, *ERG11*, *FLO8* and *MEC3* results in amphotericin B and fluconazole**  
192 **resistance but impede growth.** During micro-evolution, the MIC of amphotericin B increased  
193 8-fold in the A-lineage: from IC<sub>50</sub>: 0.5 $\mu$ g/ml (wt) to MIC<sub>50</sub>: 4 $\mu$ g/ml in strain A29 (**figure 2**).  
194 Simultaneously, cross-resistance to fluconazole emerged, with an MIC increase from 1 $\mu$ g/ml  
195 to over 64 $\mu$ g/ml (**figure 2**). Two nonsense mutations in genes involved in the ergosterol  
196 biosynthesis pathway were found (**table 1**), namely the tgG/tgA|W182\* mutation in the *ERG3*



197 gene and the Gag/Tag|E429\* mutation in the *ERG11* gene, encoding lanosterol 14-alpha-  
198 demethylase (B9J08\_001448; **table 1**). The *ERG11* mutation of strain A29 lies within a region  
199 of *ERG11* that corresponds to a frequently mutated ('hotspot') region of *ERG11* in azole  
200 resistant *C. albicans* (30, 31). It is however distinct from the three SNPs of *ERG11* (namely  
201 Y132F, K143R and F126L) that have been linked to drug (azole) resistance in *C. auris* so far  
202 (7-9, 14), and are situated in another 'hotspot' region of *ERG11* (30, 31).

203 Additionally, a nonsense mutation (Cag/Tag|Q384\*) was found in the transcription factor  
204 *FLO8* gene (B9J08\_000401, **table 1**), and a missense mutation (gCg/gTg|A272V) emerged in  
205 the *MEC3* gene which encodes a subunit part of the Rad17p-Mec3p-Ddc1p sliding clamp  
206 (B9J08\_003102; **table 1**). Remarkably, the mutation in *MEC3* increased the amphotericin B  
207 resistance two-fold (from MIC<sub>50</sub>:2µg/ml in strain L21 to MIC<sub>50</sub>:4µg/ml in strain L27, see  
208 **figure 2**). The mutation in *FLO8* did not seem to alter the drug susceptibility for fluconazole  
209 or amphotericin B. Additionally, strain A29 was found to significantly overexpress *TAC1b* and  
210 *ERG11*, as shown by reverse transcriptase quantitative PCR (RT-qPCR), shown in **figure 5**.  
211 Observations in the lab and characterization of the growth curve showed that strain A29 was  
212 most impeded in growth, compared to the wild type strain and other evolved strains, as shown  
213 in **figure 4**.

214  
215 **A *TAC1b* mutation and upregulated *CDR1* expression decrease fluconazole susceptibility.**

216 In strain F13, a codon deletion (ttc/|F15) in the *TAC1b* gene was identified (B9J08\_004820;  
217 **table 1**) that corresponded to a 32-fold increase in the MIC<sub>50</sub> of fluconazole (**figure 2**). Tac1b  
218 is an activating transcription factor, positively regulating the expression of the ATP Binding  
219 Cassette (ABC) transporter Cdr1, known to be involved in azole efflux and azole resistance in  
220 *C. auris* (16, 22). Although the mutation in strain F13 is novel, it is located in a region of  
221 *TAC1b* that is known to harbor gain-of-function mutations in fluconazole resistant clinical  
222 isolates of *C. auris*, as shown by Rybak *et al.* (16). Nevertheless, it is the first codon deletion  
223 (cfr. SNPs) in this region suggested to confer a gain of function of *C. auris TAC1b*. Gene  
224 expression analysis of strain F12 (no *TAC1b* mutation) and strain F13 (*TAC1b* mutation  
225 obtained) confirms that this mutation increased the expression of *CDR1* (B9J08\_000164)  
226 significantly, as shown in **figure 5**. The overexpression of *CDR1* is maintained in strain F30  
227 and in the multidrug-resistant strain FC17, as shown in **figure 5**.

228  
229 **Two aneuploidies independently emerged during fluconazole resistance evolution.** Read  
230 coverage of whole genome sequencing was used to analyze copy number variation (CNV), by

231 calculating normalized depth read coverage per 5kb window (see methods section). A visual  
232 representation of this normalized coverage for each chromosome in all end-point sequenced  
233 strains is displayed in **figure 6**. This reveals a segmental and whole chromosome duplication  
234 emerged in the F- and CF-lineage respectively, both seemingly involved in fluconazole  
235 resistance evolution.

236 The 191 kb segmental duplication of Chr1 in the F30 strain contained 75 protein encoding  
237 genes (based on the B11220 reference genome annotation; CP043531-CP043537), including  
238 *ERG11*. During further evolution to caspofungin in the FC-lineage (see **figure 1B**), this  
239 segmental duplication was maintained but decreased in size to 161kb containing 67 protein  
240 encoding genes (still including *ERG11*). The segmental Chr1 duplication resulted in an over  
241 two-fold decrease in fluconazole susceptibility, increasing the MIC<sub>50</sub> of 32µg/ml in strain F13  
242 to MIC<sub>50</sub> >64µg/ml in strain F30, as shown in **figure 2**. Expression analysis showed that the  
243 duplication led to increased expression of *ERG11*, not present in strain F13 (**figure 5**). Strain  
244 F30 was also marked by a slight decrease in amphotericin B susceptibility, retained in the FC17  
245 strain (**figure 2**). This is possibly due to *ERG11* overexpression.

246 The whole chromosome 5 (Chr5) duplication in the CF16 strain contained a region of 933kb  
247 encompassing 405 protein encoding genes, including and *TAC1b*. This aneuploidy marks the  
248 difference between strain C20 and strain CF16 and is therefore suggested to confer the 32-fold  
249 decrease in fluconazole susceptibility between those strains (**figure 2**). Expression analysis  
250 showed that the duplication of Chr5 correlates with a significant overexpression of *TAC1b* and  
251 *CDR2* (B9J08\_002451), but not *CDR1* in strain CF16 (**figure 5**).

252

## 253 Discussion

254 **First, this study shows the evolution of multiple mechanisms known to be involved**  
255 **in drug resistance in fungi, albeit new to *C. auris*.** In the largest screening of *C. auris* clade  
256 II strains, 62.3% of a total of 61 isolates proved to be fluconazole resistant although only 3  
257 isolates harbored a known azole-conferring mutation in *ERG11* (K143R) (32). This indicates  
258 that other mechanisms of azole resistance play a role in *C. auris* clade II (32). Here, we describe  
259 at least four molecular mechanisms, none of which include the most common mutations in  
260 *ERG11*, by which fluconazole susceptibility can decrease in a clade II *C. auris* strain *in vitro*.  
261 Previous reports show that many GOF mutations in *TAC1* or homologues of this transcription  
262 factor can confer azole resistance in *Candida* species (33-35), including *C. auris* (16), through  
263 an overexpression of the drug efflux pump Cdr1. Most GOF mutations are found in the region



264 encoding the putative transcriptional activation domain of *TAC1*, situated in the C-terminal  
265 portion of the protein in *Candida* sp. (36). Rybak *et al.* report one mutation in this region (codon  
266 deletion at position F862) to be associated with fluconazole resistance in *C. auris* although all  
267 other resistance associated mutations lie between the DNA binding, transcription factor and  
268 activation domain of *TAC1b* (16). One such mutation (F214S), discovered in an experimentally  
269 evolved strain of *C. auris*, lies in the proximity of the codon deletion at position 191 as we  
270 discover here. Based on these reports and our findings, we therefore hypothesize that F191 $\Delta$  is  
271 a new potential gain of function mutation of *C. auris TAC1b* conferring azole resistance  
272 through *CDR1* overexpression. Nevertheless, previous reports have shown that Tac1b might  
273 function in other, Cdr1-independent ways to decrease azole susceptibility in *C. auris* (16, 22).  
274 Another mechanism of reduced azole susceptibility discovered in this study involves  
275 aneuploidies. In *C. albicans*, both *TAC1* and *ERG11* are located on Chr5, and the duplication  
276 of this region by forming an isochromosome [i(5L)] has been reported to confer azole  
277 resistance *in vitro* and *in vivo* (37). Based on this and reports on azole resistance in *C. auris*  
278 due to CNVs and/or overexpression of *ERG11* (9, 15, 38), we hypothesize a similar mode of  
279 action in strain F30. Moreover, comparing drug susceptibility between strain F13 and F30, the  
280 overexpression of *ERG11* in F30 more than doubles the fluconazole MIC<sub>50</sub> compared to -the  
281 already resistant- strain F13, while it decreases the susceptibility for amphotericin B (**figure 2**).  
282 Given the fact that the duplication of *C. auris* Chr5 is the only genomic alteration that  
283 distinguishes strain CF16 from strain C20, we propose that this duplication is here too  
284 responsible for azole resistance. Expression analysis shows however, that the duplication and  
285 subsequent overexpression of *TAC1b* (**figure 5**) does not correspond to an increased expression  
286 of *CDR1*, as was expected, but *TAC1b* may play a CDR1-independent role in azole resistance  
287 of *C. auris*, as suggested by Mayr *et al.* (22).

288 The acquisition of resistance to polyenes is among the least understood of all antifungal  
289 drugs and has been linked to mutations in the ergosterol biosynthesis pathway in *Candida* sp.  
290 including *ERG2* (39), *ERG6* (40), *ERG11* (41) and *ERG3* (42). Cross resistance to azoles and  
291 amphotericin B has often been associated to the abrogation of two *ERG*-genes simultaneously  
292 (43). One such example is the combination of the loss of function (LOF) of *ERG11* and *ERG3*  
293 in *C. tropicalis* (44, 45). Upon the abrogation of *ERG11*, due to a LOF mutation or the action  
294 of azoles, a toxic 3,6-diol derivative is produced through the action of the sterol  $\Delta^{5,6}$  desaturase,  
295 encoded by *ERG3* (46). Simultaneous disruption of the function of both *ERG3* and *ERG11* can  
296 undo this detrimental effect (43). Here we show for the first time that such a mechanism of  
297 cross-resistance can establish in *C. auris*.

298 Target alteration is the most commonly observed and most studied mechanism of  
299 echinocandin resistance in *Candida* species (47). Most echinocandin resistance conferring  
300 *FKSI* mutations in *C. auris* occur at position S639 (12, 19) although most recently, a SNP at  
301 position F635, the same codon deleted in strain C3 in this study, was linked to resistance in the  
302 clinic (20), see **figure 3**. In general, mutations in echinocandin resistant *Candida* species lie  
303 within two small, strictly defined ‘hot spot regions’ of *FKSI* (47). However, the codon  
304 substitution at position 690, emerged in strain C15 occurs in the elusive ‘hot spot 3’, a third  
305 potent hot spot region discovered by site-directed mutagenesis of *S. cerevisiae* (29). This  
306 mutation occurred after the codon deletion at position 635 (in HS1) in the C-lineage but did  
307 not affect the echinocandin MIC<sub>50</sub>, possible indicating functional compensation of the altered  
308 Fks1 protein. A third mutation of strain C20 occurred in *ERG3*. One report shows that a  
309 mutation in *ERG3* in a clinical *C. parapsilosis* strain conferred both resistance to azoles and  
310 echinocandins (17). Here we observe a slight increase, rather than a decrease in fluconazole  
311 susceptibility upon the emergence of the *ERG3* mutation in strain C20 (**figure 2**). Most  
312 interestingly this mutation further increases the MIC<sub>50</sub> for caspofungin in strain C20, compared  
313 to strain C15, which only obtained *FKSI* mutations (**figure 2**). Overall, the caspofungin  
314 resistant strains (FC17, C20) show MIC values (>64µg/mL) that exceed previously reported  
315 values in *C. auris* (8, 48-50). Like Rybak *et al.* (17), we therefore suggest that the underlying  
316 mechanisms of echinocandin resistance in *C. auris*, including the role of *ERG3*, should be  
317 further investigated.

318  
319 **Four genes were mutated that were previously not or vaguely associated with drug**  
320 **resistance in fungi.** *FLO8*, mutated in the amphotericin B resistant strain A29, encodes a  
321 transcription factor known to be essential for filamentation *C. albicans* (51). This filamentation  
322 was shown to decrease the rate of programmed cell death in *C. albicans*, when exposed to  
323 amphotericin B (52). Flo8 has multiple downstream effects, one of which is the positive  
324 regulation of *ERG11* expression shown in *S. cerevisiae* (53) and thus potentially playing a role  
325 in azole and amphotericin B resistance. In a recent study of clinical *C. auris* isolates from  
326 South-America, a non-synonymous mutation in the *FLO8* gene significantly correlated to  
327 amphotericin B resistance (21). In a follow-up study on the structure of FLO8, the authors  
328 suggest a potential role of FLO8 in *C. auris* virulence and drug resistance, arguing that the  
329 *FLO8* mutation found before (21), could be a gain of function mutation (54). In our study  
330 however, we see a nonsense mutation, abrogating Flo8 at amino acid 100, assuming to be  
331 disruptive to its function. Earlier, a LOF of *FLO8* was found to play a role in azole resistance

332 with a *FLO8* deletion correlated to increased *TAC1*, *CDR1* and *CDR2* expression and azole  
333 resistance, while *FLO8* overexpression lead to decreased *CDR1* expression (55). Although  
334 these reports strengthen the suspicion of a role of Flo8 in drug resistance, we cannot validate  
335 the influence on the resistance phenotype of the nonsense mutation observed here. Further  
336 research on Flo8 in drug resistance is therefore highly desirable.

337 The fourth gene mutated during amphotericin B resistance evolution is an ortholog of  
338 *MEC3*, encoding a DNA damage checkpoint protein as part of the Rad17p-Mec3p-Ddc1p  
339 sliding clamp, involved primarily in DNA damage recognition and repair in *S. cerevisiae* (56).  
340 No clear reports of a function for *MEC3* in antifungal drug resistance were found, although  
341 two studies mention the upregulation of *MEC3* upon the acquisition of azole resistance in an  
342 experimentally evolved *C. glabrata* strain (35, 57). Our results show that the mutation in *MEC3*  
343 has a significant influence on susceptibility to amphotericin B, doubling the MIC<sub>50</sub> (**figure 2**).  
344 The mechanism behind increased amphotericin B resistance upon acquiring a mutation in  
345 *MEC3*, remains unclear.

346 Strain FC17 harbored a mutation in *CIS2*, of which the *S. cerevisiae* ortholog (*ECM38*)  
347 encodes a  $\gamma$ -glutamyltranspeptidase, involved in glutathione degradation (58), detoxification  
348 of xenobiotics (59), and cell wall biogenesis (60). The role *CIS2* plays in the latter, regarding  
349 echinocandin resistance, remains unclear but as for the former, a study from Maras and  
350 colleagues (61) illustrated that fluconazole and micafungin resistance was accompanied by  
351 altered levels of glutathione in *C. albicans*, hypothesized to counteract oxidative stress caused  
352 by these antifungal drugs. In that study, the increased levels of glutathione were accompanied  
353 by the overexpression of  $\gamma$ -glutamylcysteine synthetase (61). A role for *CIS2* and glutathione  
354 catabolism, in drug resistance mediated by an altered redox metabolism remains to be  
355 elucidated.

356 The fourth mutation in the FC-lineage lays within a gene predicted to encode *PEA2*, a  
357 subunit of the polarisome, involved in polarized growth and morphogenesis in *S. cerevisiae*  
358 (62). This mutation has however no significant effect on the drug resistance profile and might  
359 thus be the result of random genetic drift.

360

361 **Experimental evolution can be a powerful tool to research resistance, although it**  
362 **has limitations.** Due to recent advances in next generation sequencing technology, genome-  
363 wide studies of drug resistance have become more common (63, 64). The classic approach of  
364 sequencing drug resistant clinical isolates directly from patients (63) has many limitations,

365 including the often unavailability of the original genotype and the difficulty to resolve  
366 mutations associated with drug resistance from those that have accumulated due to host-  
367 pathogen interactions. *In vitro* experimental evolution copes with most of these problems (63,  
368 65), is highly repeatable and allows controlled long term monitoring of different strains and  
369 conditions. Moreover, the ability to isolate and investigate each generation separately, allows  
370 to monitor both the speed and the stepwise progression of drug resistance development.  
371 Nevertheless, *in vitro* experimental evolution has its own limitations, such as the homogeneity  
372 of the selective pressure in the absence of metabolization of the drug, tissue specific exposure  
373 and host-pathogen interactions. However, studies of antifungal drug resistance by *in vitro*  
374 evolution often resemble acquired resistance found in clinical isolates (63, 65). In regards to  
375 our results, a comparative analysis of mutations reported in literature and re-analysis of variants  
376 predicted in 304 sequenced clinical isolates of *C. auris* (9), show that most mechanisms of drug  
377 resistance proposed here are novel. One must be careful by redeeming these findings to be  
378 nonrelevant to the *in vivo* setting or clinical environment, reports on resistance mutations  
379 (providing whole genome analysis) is still scarce and the data base of 304 sequenced clinical  
380 isolates of *C. auris* (9) is still limited, with only 23% of isolates reported multidrug-resistant  
381 and only include 7 clinical isolates that belong to clade II (6 isolates pan-susceptible, 1 isolate  
382 fluconazole resistant) (9). This and other studies in bacteria (66) and fungi (13, 65, 67) show  
383 that *in vitro* experimental evolution can be a powerful tool, especially if combined with an  
384 effective approach to trace the full evolutionary history of mutation events, as we did here  
385 using allele-specific PCR screening

386

387 ***Candida auris* clade II is, like most other *C. auris* clades, exceptionally capable of**  
388 **MDR development.** Clade II *C. auris* is one of the least studied clades (25) and this report  
389 aids to close this research gap. In general, few phenotypic differences have been characterized  
390 that differentiate the five *C. auris* clades from one another, although collected isolates vary  
391 substantially in the frequency of drug resistance between clades and mutations identified (9,  
392 15). More research should be performed identify clade specific phenotypes or evolutionary  
393 tendencies, to anticipate on geographically defined emergence and outbreaks in the field.  
394 Overall, *C. auris* is still significantly understudied, compared to other *Candida* species such as  
395 *C. albicans* and *C. glabrata*, despite the fact that it is an urgent antimicrobial resistant threat  
396 (4). Further fundamental knowledge on how *C. auris* can thrive as “nosocomial MDR fungus”  
397 is highly needed to efficiently tackle this pathogen in the future.

## 398 **Materials and methods**

### 399 **Strains and growth conditions**

400 All experiments were performed with *C. auris* strain B11220 (CBS10913) from the Westerdijk  
401 Fungal Biodiversity Center ([wi.knaw.nl](http://wi.knaw.nl)). Strains were grown on YPD agar (2% glucose) at  
402 37°C and enriched in RPMI – MOPS liquid medium containing 2% glucose at 37°C in a  
403 shaking incubator overnight. All strains, including daily aliquots of serially transferred  
404 populations in the micro-evolution assay, were stored at -80°C in RPMI – MOPS medium  
405 containing 25% glycerol.

406

### 407 **Antifungal susceptibility testing**

408 The Minimal Inhibitory Concentration (MIC) was determined by a broth dilution assay (BDA)  
409 according to Clinical and Laboratory Standards Insititute (CLSI) guidelines (68). In short, a  
410 dilution of 64µg/ml to 0.06 µg/ml of each drug was prepared in RPMI-MOPS medium in a 96-  
411 well polystyrene microtiter plate. A standardized amount of 100 to 500 cells was dissolved in  
412 a final volume of 200µL per well and plates were incubated at 37°C. Growth was measured  
413 after 48h of incubation through spectrophotometric quantification of OD<sub>600</sub> in a  
414 SPECTRAmax® Plus 384 microplate reader (Molecular Devices). Minimal Fungicidal  
415 Concentration (MFC) was determined by spotting the resuspended 96-well microtiter plate  
416 content on YPD agar (2% glucose) and incubation for 48h. Resistance is determined through  
417 tentative breakpoints provided by the CDC (6).

418

### 419 **In vitro experimental evolution assay**

420 An overview of the design of the experimental evolution assay is given in figure 1A. At the  
421 start of the evolution experiment, 10<sup>6</sup> cells are diluted in a 5ml volume of RPMI-MOPS  
422 medium (2% glucose) containing no drug (control) or a drug at a concentration of 1/2xMIC<sub>50</sub>,  
423 1xMIC<sub>50</sub> or 2xMIC<sub>50</sub>. All conditions were performed in triplicate (3 evolving populations per  
424 condition). After 24h of incubation at 37°C in a shaking incubator, growth of each population  
425 was compared to the average growth of 3 controls (no drug) by spectrophotometric  
426 quantification (OD<sub>600</sub>). Next, 500µL of each population was transferred to 4500µL of fresh  
427 medium with a concentration of drug equal to the previous culture when OD<sub>600</sub> [evolving  
428 population] ≤ OD<sub>600</sub> [average control] or double to the previous culture when OD<sub>600</sub> [evolving  
429 population] > OD<sub>600</sub> [average control]. The experiment was terminated after 30 days or if the  
430 MIC<sub>50</sub> exceeded the resistance breakpoint value, as evaluated by intermediate MIC testing.

431

### 432 **Analysis of growth**

433 Growth was assessed by spectrophotometric observation (OD<sub>595</sub>) over time in a Multiskan™  
434 GO (Thermo Scientific) automated plate reader using flat bottom 96-well plates and intermitted  
435 (30 min. interval) pulsed shaking (medium strength, 5 min). Cultures were diluted in RPMI-  
436 MOPS medium containing 0.2% or 2% glucose, to a final volume of 10<sup>6</sup> cells per well. Growth  
437 was measured for 72h at 37°C. Growth curves were plotted as an average values of 3 biological  
438 repeats with 3 technical repeats per biological repeat.

439

### 440 **DNA extraction**

441 Genomic DNA for whole genome sequencing was extracted using the MasterPure™ Yeast  
442 DNA Purification kit (Lucigen, US) following the manufacturers protocol. For (AS-)PCR and  
443 sanger sequencing, DNA was isolated from the cells through phenol chloroform isoamyl  
444 alcohol (PCI) extraction. Cells were dissolved in 300µL Tris EDTA (TE) buffer with 300µL  
445 PCI solution (phenol pH 6.7 – chloroform – isoamylalcohol 25:24:1) and lysed by micro-bead  
446 shearing in a ‘fast prep’ centrifuge (20 sec, 6m/sec)(MP biomedical™). After cell lysis, DNA  
447 was isolated and purified using ethanol precipitation. The resulting DNA was diluted to a  
448 concentration of 200ng/µL in milliQ H<sub>2</sub>O, based on the DNA concentration measured through  
449 absorbance at 260 nm with a NanoDrop spectrophotometer (Isogen).

450

### 451 **Whole genome sequencing and analysis**

452 Genomic libraries were created using the NEBNext® Ultra DNA library Prep Kit for Illumina  
453 sequencing (New England Biolabs, US) and genomes were sequenced on an Illumina MiSeq  
454 v2 500 (Illumina, US) obtaining a coverage of at least 50x. Standard quality control was  
455 performed using FastQC v0.11.7 (69). Paired end reads were aligned using BWA mem v0.7.17  
456 (70) to the annotated genome assemblies of strain B8441 [clade I; Genbank:  
457 GCA\_002759435.2 (15)] and B11220 [clade II; Genbank: CP043531-CP043537 (26)] . For  
458 SNP and Indel identification, the assembly alignment to the annotated genome of strain B8441  
459 (clade I) was used, while CNV analysis was performed using the assembly alignment to  
460 reference genome B11220 (clade II) respectively. The genome sequences of all end-point  
461 experimentally evolved strains were deposited to NCBI sequencing read archive (SRA) under  
462 “BioProject PRJNA664007”. Variants were identified and filtered using GATK v4.1.2.1 (71,  
463 72), with the haploid mode, and including GATK tools HaplotypeCaller and Variant Filtration  
464 using “QD < 2.0 | FS > 60.0 | MQ < 40.0”. In addition, variants were filtered if they have



465 minimum genotype (GT) quality < 50, Alternate Allele Frequency < 0.8, or allelic depth (DP)  
466 < 10. The final VCF was annotated using SnpEff v4.3T (73). CNVs were identified using  
467 CNVnator v0.3 (74), selecting for 1kb genomic windows of significant ( $p < 0.01$ ) variation in  
468 normalized coverage. The average depth per 5kb window was normalized to the coverage of  
469 the whole genome sequence for each isolate and plotted in R (75). Candidate variants were  
470 compared with a set of 304 globally distributed *C. auris* isolates representing Clade I, II, III  
471 and IV (9).

472

473

#### 474 **PCR and Sanger sequencing**

475 Primers for PCR and Sanger sequencing were designed *in silico* using CLC Genomics  
476 Workbench v20.0.3 (digitalinsights.qiagen.com). Primer design was based on B11220 WGS  
477 consensus sequences of the regions of interest and sequences of the genes of interest in  
478 reference genome *C. auris* B8441 downloaded from the Candida genome database  
479 (candidagenome.org). Sequencing primers were designed to include a +/-1000 region of  
480 interest (spanning the region with the mutation of interest). All primers are given in **table S1**.  
481 Amplification of regions of interest was achieved through PCR using Q5 high-fidelity DNA  
482 polymerase (New England Biolabs Inc.). The total reaction volume of 50 $\mu$ L consisted of the  
483 200ng/ $\mu$ L DNA extract, 5 $\mu$ L dNTPs (0.2mM), 10 $\mu$ L Q5 buffer, 0,5 $\mu$ L Q5 polymerase (2 units),  
484 milliQ, and 0,4 $\mu$ L of both forward and reverse primer (1  $\mu$ M). The PCR program consisted of  
485 initial denaturation at 98 $^{\circ}$ C for 3 sec, 30 cycles of 98 $^{\circ}$ C for 15 sec, 56 $^{\circ}$ C for 25 sec, 72 $^{\circ}$ C for  
486 2 min and a final elongation step at 72 $^{\circ}$ C for 2 min in a Labcycler Basic thermocycler (Bioké).  
487 Correct amplification was verified by performing electrophoresis on a 1% agarose gel at 135V  
488 for 25 min. After verification, the sequencing primers (10 $\mu$ M ) were added to PCR amplicons  
489 and the DNA was sequenced using Sanger sequencing by Eurofins (GATC, Germany).

490

#### 491 **Allele-specific PCR (AS-PCR)**

492 The emergence of SNPs and Indels was traced back in whole populations and a maximum of  
493 30 single clones (colonies) per population, using a rapid sequencing free method: allele-  
494 specific SNP-PCR. Two primer pairs per gene of interest were designed according to Liu *et al.*  
495 (28), consisting of one universal primer or and one mutant-allele primer or wild type-allele  
496 primer respectively. Primers consist of an allele specific region at the 3' terminal nucleotide of  
497 the mutant or wild type allele specific primer. Additionally, a mismatch at the 3th nucleotide

498 from the 3' terminal was included to increase annealing specificity (28). All primers used for  
499 AS-PCR are listed in **table S1**.

500 To validate primer specificity, a temperature gradient PCR was performed in which annealing  
501 temperature varied between 60°C and 70°C. AS-PCR sensitivity was assessed by performing  
502 PCR on serial dilution of reference DNA template. All PCR reactions were performed in a total  
503 reaction volume of 20µL consisted of 1µL of 1/20 dilution of the pure PCI DNA extract, 5µL  
504 dNTPs (0.2mM), 10µL TaqE buffer, 0,5µL TaqE polymerase (2 units), milliQ, and 0,4µL of  
505 both forward and reverse primer (1 µM). The PCR program consisted of initial denaturation at  
506 98°C for 3 sec, 30 cycles of 98°C for 15 sec, 56°C for 25 sec, 72°C for 2 min and a final  
507 elongation step at 72°C for 2 min in a Labcycler Basic thermocycler (Bioké). Amplification  
508 and thus the presence or absence of a mutation was verified by performing electrophoresis on  
509 a 1% agarose gel at 135V for 25 min.

510

### 511 **Gene expression and copy number variation analysis**

512 *C. auris* cells from a single colony grown overnight on YPD agar (2% glucose) were enriched  
513 in RPMI-MOPS (2% glucose) medium for 16h. These cultures were diluted to 10<sup>8</sup> cells in a  
514 volume of 50ml fresh RPMI-MOPS (2% glucose) medium and incubated for 8h at 37°C in a  
515 shaking incubator to ensure the harvested cells are growing in the exponential growth phase.  
516 Next, cells were harvested by centrifugation, washing in ice cold PBS, snap freezing in liquid  
517 nitrogen and stored at -80°C.

518 For gene expression analysis (RNA extraction and RT-qPCR), cells were resuspended in 1ml  
519 trizol and lysed by micro-bead shearing in a 'fast prep' centrifuge (20 sec, 6m/sec)(MP  
520 biomedical™). Nucleotides were extracted by washing the lysate supernatant with chloroform  
521 (360µL) and isopropanol (350µL) and precipitated by washing three times with 70% ethanol.  
522 Nucleotide concentrations and purity were measured spectrophotometrically using a NanoDrop  
523 ND-1000 (Isogen Life Science). Extracts were diluted to 1µg pure nucleotide concentration  
524 and purified by DNase treatment (New England Biolabs). cDNA was synthesized from RNA  
525 by using the iScript cDNA synthesis kit (Bio-Rad) according to the manufacturer's  
526 recommendations. Real Time qPCR was performed using GoTaq polymerase (Promega) and  
527 the StepOnePlus real-time PCR thermocycler (ThermoFisher) as follows: activation at 95°C  
528 for 2 min, 40 cycles of denaturation at 95°C for 3 seconds and annealing/extension at 60°C for  
529 30 seconds. Primers used for qPCR were designed with the PrimerQuest tool of IDT  
530 (<https://eu.idtdna.com/Primerquest/>) and are listed in **table S1**. A total of 8 housekeeping genes  
531 involved in various cellular processes were assessed, of which the 3 most stable candidates

532 were used in the analysis (*ACT1*, *LSC2*, *UBC4*). Gene expression analysis was performed using  
533 qBasePlus software. Fold Change (with SD) was plotted from  $\log_2(Y)$  transformed data and  
534 compared statistically (using a one-way ANOVA with multiple comparisons in respect to wt)  
535 with GraphPad Prism. Expression analysis in each strain was performed using 3 biological  
536 repeats each represented by the average of 2 technical repeats.  
537 For copy number variation analysis, gDNA was extracted as described in ‘DNA extraction’ of  
538 methods section and standardized concentrations of 0.5 ng/ $\mu$ L of gDNA were used to quantify  
539 target markers (*TAC1b* and *ERG11* respectively) by qPCR using the same primers, protocol  
540 and analysis as described above.

## 541 Acknowledgement

542 This work was supported by an FWO personal research grant nr. 11D7620N awarded to H.C.  
543 A travel grant awarded by FWO allowed a fruitful research stay of H.C. at Broad Institute  
544 (Boston, US). C.A.C and J.F.M. were supported by the National Institute of Allergy and  
545 Infectious Diseases, National Institutes of Health, Department of Health and Human Services,  
546 under award U19AI110818 to the Broad Institute. We want to thank the group of prof.  
547 Steenackers (KULeuven) for their advice on experimental evolution.

## 548 References

- 549 1. Satoh K, Makimura K, Hasumi Y, Nishiyama Y, Uchida K, Yamaguchi H. 2009.  
550 *Candida auris* sp. nov., a novel ascomycetous yeast isolated from the external ear canal  
551 of an inpatient in a Japanese hospital. *Microbiol Immunol* 53:41-4.
- 552 2. Kean R, Brown J, Gulmez D, Ware A, Ramage G. 2020. *Candida auris*: a decade of  
553 understanding of an enigmatic pathogenic yeast. *J Fungi (Basel)* 6.
- 554 3. Forsberg K, Woodworth K, Walters M, Berkow EL, Jackson B, Chiller T, Vallabhaneni  
555 S. 2019. *Candida auris*: The recent emergence of a multidrug-resistant fungal pathogen.  
556 *Med Mycol* 57:1-12.
- 557 4. CDC. 2019. Antibiotic Resistance Threats in the United States, 2019, on U.S.  
558 Department of Health and Human Services, CDC. Accessed 26/03/20.
- 559 5. Magobo RE, Corcoran C, Seetharam S, Govender NP. 2014. *Candida auris*-associated  
560 candidemia, South Africa. *Emerg Infect Dis* 20:1250-1.
- 561 6. CDC. 2020. *C. auris* - Antifungal susceptibility testing and interpretation, on U.S.  
562 Department of Health & Human Services. <https://www.cdc.gov/fungal/candida-auris/c-auris-antifungal.html>. Accessed 26/03/20.
- 563 7. Lockhart SR, Etienne KA, Vallabhaneni S, Farooqi J, Chowdhary A, Govender NP,  
564 Colombo AL, Calvo B, Cuomo CA, Desjardins CA, Berkow EL, Castanheira M,  
565 Magobo RE, Jabeen K, Asghar RJ, Meis JF, Jackson B, Chiller T, Litvintseva AP. 2017.  
566 Simultaneous emergence of multidrug-resistant *Candida auris* on 3 continents  
567 confirmed by whole-genome sequencing and epidemiological analyses. *Clin Infect Dis*  
568 64:134-140.
- 569

- 570 8. Chowdhary A, Prakash A, Sharma C, Kordalewska M, Kumar A, Sarma S, Tarai B,  
571 Singh A, Upadhyaya G, Upadhyay S, Yadav P, Singh PK, Khillan V, Sachdeva N,  
572 Perlin DS, Meis JF. 2018. A multicentre study of antifungal susceptibility patterns  
573 among 350 *Candida auris* isolates (2009-17) in India: role of the *ERG11* and *FKSI*  
574 genes in azole and echinocandin resistance. *J Antimicrob Chemother* 73:891-899.
- 575 9. Chow NA, Muñoz JF, Gade L, Berkow E, Li X, Welsh RM, Forsberg K, Lockhart SR,  
576 Adam R, Alanio A, Alastruey-Izquierdo A, Althawadi S, Belén Araúz A, Ben-Ami R,  
577 Bharat A, Calvo B, Desnos-Ollivier M, Escandón P, Gardam D, Gunturu R, Heath CH,  
578 Kurzai O, Martin R, Litvintseva AP, Cuomo CA. 2020. Tracing the evolutionary  
579 history and global expansion of *Candida auris* using population genomic analyses.  
580 *mBio* doi:10.1128/mBio.03364-19.
- 581 10. Bishop L, Cummins M, Guy R, Hoffman P, Jeffery K, Jeffery-Smith A, Brown C. 2017.  
582 Guidance for the laboratory investigation, management and infection prevention and  
583 control for cases of *Candida auris*. *Public Health England* Updated August.
- 584 11. Kathuria S, Singh PK, Sharma C, Prakash A, Masih A, Kumar A, Meis JF, Chowdhary  
585 A. 2015. Multidrug-resistant *Candida auris* misidentified as *Candida haemulonii*:  
586 characterization by matrix-assisted laser desorption ionization-time of flight mass  
587 spectrometry and DNA sequencing and its antifungal susceptibility profile variability  
588 by Vitek 2, CLSI broth microdilution, and Etest method. *J Clin Microbiol* 53:1823-30.
- 589 12. Lockhart SR. 2019. *Candida auris* and multidrug resistance: Defining the new normal.  
590 *Fungal Genet Biol* 131:103243.
- 591 13. Ksiezopolska E, Gabaldon T. 2018. Evolutionary emergence of drug resistance in  
592 *Candida* opportunistic pathogens. *Genes (Basel)* 9.
- 593 14. Healey KR, Kordalewska M, Jimenez Ortigosa C, Singh A, Berrio I, Chowdhary A,  
594 Perlin DS. 2018. Limited *ERG11* mutations identified in isolates of *Candida auris*  
595 directly contribute to reduced azole susceptibility. *Antimicrob Agents Chemother* 62.
- 596 15. Muñoz JF, Gade L, Chow NA, Loparev VN, Juieng P, Berkow EL, Farrer RA,  
597 Litvintseva AP, Cuomo CA. 2018. Genomic insights into multidrug-resistance, mating  
598 and virulence in *Candida auris* and related emerging species. *Nat Commun* 9:5346.
- 599 16. Rybak JM, Muñoz JF, Barker KS, Parker JE, Esquivel BD, Berkow EL, Lockhart SR,  
600 Gade L, Palmer GE, White TC, Kelly SL, Cuomo CA, Rogers PD. 2020. Mutations in  
601 *TAC1B*: a novel genetic determinant of clinical fluconazole resistance in *Candida auris*.  
602 *mBio* 11.
- 603 17. Rybak JM, Dickens CM, Parker JE, Caudle KE, Manigaba K, Whaley SG, Nishimoto  
604 AT, Luna-Tapia A, Roy S, Zhang Q, Barker KS, Palmer GE, Sutter TR, Homayouni R,  
605 Wiederhold NP, Kelly SL, Rogers PD. 2017. Loss of C-5 sterol desaturase activity  
606 results in increased resistance to azole and echinocandin antifungals in a clinical isolate  
607 of *Candida parapsilosis*. *Antimicrob Agents Chemother* 61.
- 608 18. Kim SH, Iyer KR, Pardeshi L, Munoz JF, Robbins N, Cuomo CA, Wong KH, Cowen  
609 LE. 2019. Genetic analysis of *Candida auris* implicates Hsp90 in morphogenesis and  
610 azole tolerance and Cdr1 in azole resistance. *mBio* 10.
- 611 19. Chaabane F, Graf A, Jequier L, Coste AT. 2019. Review on antifungal resistance  
612 mechanisms in the emerging pathogen *Candida auris*. *Front Microbiol* 10:2788.
- 613 20. Sharma D, Paul RA, Chakrabarti A, Bhattacharya S, Soman R, Shankarnarayan SA,  
614 Chavan D, Das P, Kaur H, Ghosh A. 2020. Caspofungin resistance in *Candia auris* due  
615 to mutations in *FksI* with adjunctive role of chitin and key cell wall stress response  
616 pathway genes doi:<https://doi.org/10.1101/2020.07.09.196600>, *BioRxiv*.
- 617 21. Escandon P, Chow NA, Caceres DH, Gade L, Berkow EL, Armstrong P, Rivera S,  
618 Misas E, Duarte C, Moulton-Meissner H, Welsh RM, Parra C, Pescador LA, Villalobos  
619 N, Salcedo S, Berrio I, Varon C, Espinosa-Bode A, Lockhart SR, Jackson BR,

- 620 Litvintseva AP, Beltran M, Chiller TM. 2019. Molecular epidemiology of *Candida*  
621 *auris* in Colombia reveals a highly related, countrywide colonization with regional  
622 patterns in amphotericin B resistance. *Clin Infect Dis* 68:15-21.
- 623 22. Mayr EM, Ramirez-Zavala B, Kruger I, Morschhauser J. 2020. A zinc cluster  
624 transcription factor contributes to the intrinsic fluconazole resistance of *Candida*  
625 *auris*. *mSphere* 5.
- 626 23. Rybak JM, Doorley LA, Nishimoto AT, Barker KS, Palmer GE, Rogers PD. 2019.  
627 Abrogation of triazole resistance upon deletion of *CDR1* in a clinical isolate of *Candida*  
628 *auris*. *Antimicrob Agents Chemother* 63.
- 629 24. Grahl N, Demers EG, Crocker AW, Hogan DA. 2017. Use of RNA-protein complexes  
630 for genome editing in non-albicans *Candida* species. *mSphere* 2.
- 631 25. Welsh RM, Sexton DJ, Forsberg K, Vallabhaneni S, Litvintseva A. 2019. Insights into  
632 the unique nature of the East Asian clade of the emerging pathogenic yeast *Candida*  
633 *auris*. *J Clin Microbiol* 57.
- 634 26. Muñoz JF, Welsh RM, Shea T, Batra D, Gade L, Litvintseva AP, Cuomo CA. 2019.  
635 Chromosomal rearrangements and loss of subtelomeric adhesins linked to clade-  
636 specific phenotypes in *Candida auris* doi:<https://doi.org/10.1101/754143>, BioRxiv.
- 637 27. Chow NA, de Groot T, Badali H, Abastabar M, Chiller TM, Meis JF. 2019. Potential  
638 fifth clade of *Candida auris*, Iran, 2018. *Emerg Infect Dis* 25:1780-1781.
- 639 28. Liu J, Huang S, Sun M, Liu S, Liu Y, Wang W, Zhang X, Wang H, Hua W. 2012. An  
640 improved allele-specific PCR primer design method for SNP marker analysis and its  
641 application. *Plant Methods* 8:34.
- 642 29. Johnson ME, Katiyar SK, Edlind TD. 2011. New Fks hot spot for acquired  
643 echinocandin resistance in *Saccharomyces cerevisiae* and its contribution to intrinsic  
644 resistance of *Scedosporium* species. *Antimicrob Agents Chemother* 55:3774-81.
- 645 30. Marichal P, Koymans L, Willemsens S, Bellens D, Verhasselt P, Luyten W, Borgers  
646 M, Ramaekers F, Odds FC, Bossche Vande H. 1999. Contribution of mutations in the  
647 cytochrome P450 14 $\alpha$ -demethylase (Erg11p, Cyp51p) to azole resistance in *Candida*  
648 *albicans*. *Microbiology* 145:2701-2713.
- 649 31. Wang H, Kong F, Sorrell TC, Wang B, McNicholas P, Pantarat N, Ellis D, Xiao M,  
650 Widmer F, Chen SCA. 2009. Rapid detection of *ERG11* gene mutations in clinical  
651 *Candida albicans* isolates with reduced susceptibility to fluconazole by rolling circle  
652 amplification and DNA sequencing. *BMC microbiology* 9:167.
- 653 32. Kwon YJ, Shin JH, Byun SA, Choi MJ, Won EJ, Lee D, Lee SY, Chun S, Lee JH, Choi  
654 HJ, Kee SJ, Kim SH, Shin MG. 2019. *Candida auris* clinical isolates from South Korea:  
655 identification, antifungal susceptibility, and genotyping. *J Clin Microbiol* 57.
- 656 33. Coste A, Selmecki A, Forche A, Diogo D, Bougnoux ME, d'Enfert C, Berman J,  
657 Sanglard D. 2007. Genotypic evolution of azole resistance mechanisms in sequential  
658 *Candida albicans* isolates. *Eukaryot Cell* 6:1889-904.
- 659 34. Coste A, Karababa M, Ischer F, Bille J, Sanglard D. 2004. *TAC1*, transcriptional  
660 activator of CDR genes, is a new transcription factor involved in the regulation of  
661 *Candida albicans* ABC transporters *CDR1* and *CDR2*. *Eukaryot Cell* 3:1639-52.
- 662 35. Vermitsky JP, Earhart KD, Smith WL, Homayouni R, Edlind TD, Rogers PD. 2006.  
663 *Pdr1* regulates multidrug resistance in *Candida glabrata*: gene disruption and genome-  
664 wide expression studies. *Mol Microbiol* 61:704-22.
- 665 36. Sanglard D, Coste A, Ferrari S. 2009. Antifungal drug resistance mechanisms in fungal  
666 pathogens from the perspective of transcriptional gene regulation. *FEMS Yeast*  
667 *Research* 9:1029-1050.



- 668 37. Selmecki A, Gerami-Nejad M, Paulson C, Forche A, Berman J. 2008. An  
669 isochromosome confers drug resistance *in vivo* by amplification of two genes, *ERG11*  
670 and *TAC1*. *Mol Microbiol* 68:624-41.
- 671 38. Bhattacharya S, Holowka T, Orner EP, Fries BC. 2019. Gene duplication associated  
672 with increased fluconazole tolerance in *Candida auris* cells of advanced generational  
673 age. *Scientific reports* 9:1-13.
- 674 39. Hull CM, Bader O, Parker JE, Weig M, Gross U, Warrilow AG, Kelly DE, Kelly SL.  
675 2012. Two clinical isolates of *Candida glabrata* exhibiting reduced sensitivity to  
676 amphotericin B both harbor mutations in *ERG2*. *Antimicrob Agents Chemother*  
677 56:6417-21.
- 678 40. Vandeputte P, Tronchin G, Berges T, Hennequin C, Chabasse D, Bouchara JP. 2007.  
679 Reduced susceptibility to polyenes associated with a missense mutation in the *ERG6*  
680 gene in a clinical isolate of *Candida glabrata* with pseudohyphal growth. *Antimicrob*  
681 *Agents Chemother* 51:982-90.
- 682 41. Hull CM, Parker JE, Bader O, Weig M, Gross U, Warrilow AG, Kelly DE, Kelly SL.  
683 2012. Facultative sterol uptake in an ergosterol-deficient clinical isolate of *Candida*  
684 *glabrata* harboring a missense mutation in *ERG11* and exhibiting cross-resistance to  
685 azoles and amphotericin B. *Antimicrob Agents Chemother* 56:4223-32.
- 686 42. Sanglard D, Ischer F, Parkinson T, Falconer D, Bille J. 2003. *Candida albicans*  
687 mutations in the ergosterol biosynthetic pathway and resistance to several antifungal  
688 agents. *Antimicrob Agents Chemother* 47:2404-12.
- 689 43. Sanglard D. 2016. Emerging threats in antifungal-resistant fungal pathogens. *Front*  
690 *Med (Lausanne)* 3:11.
- 691 44. Eddouzi J, Parker JE, Vale-Silva LA, Coste A, Ischer F, Kelly S, Manai M, Sanglard  
692 D. 2013. Molecular mechanisms of drug resistance in clinical *Candida* species isolated  
693 from Tunisian hospitals. *Antimicrob Agents Chemother* 57:3182-93.
- 694 45. Vincent BM, Lancaster AK, Scherz-Shouval R, Whitesell L, Lindquist S. 2013. Fitness  
695 trade-offs restrict the evolution of resistance to amphotericin B. *PLoS Biol*  
696 11:e1001692.
- 697 46. Kelly SL, Lamb DC, Corran AJ, Baldwin BC, Kelly DE. 1995. Mode of action and  
698 resistance to azole antifungals associated with the formation of 14 alpha-methylergosta-  
699 8,24(28)-dien-3 beta,6 alpha-diol. *Biochem Biophys Res Commun* 207:910-5.
- 700 47. Perlin DS. 2015. Mechanisms of echinocandin antifungal drug resistance. *Ann N Y*  
701 *Acad Sci* 1354:1-11.
- 702 48. Biagi MJ, Wiederhold NP, Gibas C, Wickes BL, Lozano V, Bleasdale SC, Danziger L.  
703 Development of high-level echinocandin resistance in a patient with recurrent *Candida*  
704 *auris* candidemia secondary to chronic candiduria, p ofz262. *In* (ed), Oxford University  
705 Press US,
- 706 49. Kordalewska M, Lee A, Park S, Berrio I, Chowdhary A, Zhao Y, Perlin DS. 2018.  
707 Understanding echinocandin resistance in the emerging pathogen *Candida auris*.  
708 *Antimicrobial agents and chemotherapy* 62.
- 709 50. O'Brien B, Liang J, Chaturvedi S, Jacobs J, Chaturvedi V. 2020. Pan-resistant *Candida*  
710 *auris*: New York Sub-cluster Susceptible to Antifungal Combinations. *BioRxiv*  
711 doi:<https://doi.org/10.1101/2020.06.08.136408>.
- 712 51. Cao F, Lane S, Raniga PP, Lu Y, Zhou Z, Ramon K, Chen J, Liu H. 2006. The Flo8  
713 transcription factor is essential for hyphal development and virulence in *Candida*  
714 *albicans*. *Mol Biol Cell* 17:295-307.
- 715 52. Laprade DJ, Brown MS, McCarthy ML, Ritch JJ, Austriaco N. 2016. Filamentation  
716 protects *Candida albicans* from amphotericin B-induced programmed cell death via a  
717 mechanism involving the yeast metacaspase, *MCA1*. *Microb Cell* 3:285-292.



- 718 53. Woods K, Hofken T. 2016. The zinc cluster proteins Upc2 and Ecm22 promote  
719 filamentation in *Saccharomyces cerevisiae* by sterol biosynthesis-dependent and -  
720 independent pathways. *Mol Microbiol* 99:512-27.
- 721 54. Misas E, Escandon P, McEwen JG, Clay OK. 2019. The LUF5 domain, its  
722 transcriptional regulator proteins, and drug resistance in the fungal pathogen *Candida*  
723 *auris*. *Protein Sci* 28:2024-2029.
- 724 55. Li WJ, Liu JY, Shi C, Zhao Y, Meng LN, Wu F, Xiang MJ. 2019. *FLO8* deletion leads  
725 to azole resistance by upregulating *CDR1* and *CDR2* in *Candida albicans*. *Res*  
726 *Microbiol* 170:272-279.
- 727 56. Majka J, Burgers PM. 2003. Yeast Rad17/Mec3/Ddc1: a sliding clamp for the DNA  
728 damage checkpoint. *Proc Natl Acad Sci U S A* 100:2249-54.
- 729 57. Tsai HF, Sammons LR, Zhang X, Suffis SD, Su Q, Myers TG, Marr KA, Bennett JE.  
730 2010. Microarray and molecular analyses of the azole resistance mechanism in *Candida*  
731 *glabrata* oropharyngeal isolates. *Antimicrob Agents Chemother* 54:3308-17.
- 732 58. Kumar C, Sharma R, Bachhawat AK. 2003. Utilization of glutathione as an exogenous  
733 sulfur source is independent of gamma-glutamyl transpeptidase in the yeast  
734 *Saccharomyces cerevisiae*: evidence for an alternative glutathione degradation pathway.  
735 *FEMS Microbiol Lett* 219:187-94.
- 736 59. Ubiyvovk VM, Blazhenko OV, Gigot D, Penninckx M, Sibirny AA. 2006. Role of  
737 gamma-glutamyltranspeptidase in detoxification of xenobiotics in the yeasts  
738 *Hansenula polymorpha* and *Saccharomyces cerevisiae*. *Cell Biol Int* 30:665-71.
- 739 60. Lussier M, White AM, Sheraton J, di Paolo T, Treadwell J, Southard SB, Horenstein  
740 CI, Chen-Weiner J, Ram AF, Kapteyn JC, Roemer TW, Vo DH, Bondoc DC, Hall J,  
741 Zhong WW, Sdicu AM, Davies J, Klis FM, Robbins PW, Bussey H. 1997. Large scale  
742 identification of genes involved in cell surface biosynthesis and architecture in  
743 *Saccharomyces cerevisiae*. *Genetics* 147:435-50.
- 744 61. Maras B, Angioletta L, Mignogna G, Vavala E, Macone A, Colone M, Pitari G,  
745 Stringaro A, Dupre S, Palamara AT. 2014. Glutathione metabolism in *Candida*  
746 *albicans* resistant strains to fluconazole and micafungin. *PLoS One* 9:e98387.
- 747 62. Song Q, Johnson C, Wilson TE, Kumar A. 2014. Pooled segregant sequencing reveals  
748 genetic determinants of yeast pseudohyphal growth. *PLoS Genet* 10:e1004570.
- 749 63. Robbins N, Caplan T, Cowen LE. 2017. Molecular Evolution of Antifungal Drug  
750 Resistance. *Annu Rev Microbiol* 71:753-775.
- 751 64. Sanglard D. 2019. Finding the needle in a haystack: Mapping antifungal drug resistance  
752 in fungal pathogen by genomic approaches. *PLoS Pathog* 15:e1007478.
- 753 65. Pais P, Galocha M, Viana R, Cavalheiro M, Pereira D, Teixeira MC. 2019.  
754 Microevolution of the pathogenic yeasts *Candida albicans* and *Candida glabrata*  
755 during antifungal therapy and host infection. *Microb Cell* 6:142-159.
- 756 66. Lukacisinova M, Bollenbach T. 2017. Toward a quantitative understanding of  
757 antibiotic resistance evolution. *Curr Opin Biotechnol* 46:90-97.
- 758 67. Fisher KJ, Lang GI. 2016. Experimental evolution in fungi: An untapped resource.  
759 *Fungal Genet Biol* 94:88-94.
- 760 68. Wayne P, CLSI. 2008. Reference Method for Broth Dilution Antifungal Susceptibility  
761 Testing of Yeasts; Approved Standard—Third Edition. CLSI document M27-A3. 28.
- 762 69. Andrews S. 2010. FastQC, Babraham Bioinformatics,  
763 <http://www.bioinformatics.babraham.ac.uk/projects/fastqc/>.
- 764 70. Li H. 2013. Aligning sequence reads, clone sequences and assembly contigs with  
765 BWA-MEM, arXiv:1303.3997 <https://arxiv.org/abs/1303.3997>.

- 766 71. DePristo MA, Banks E, Poplin R, Garimella KV, Maguire JR, Hartl C, Philippakis AA,  
767 Del Angel G, Rivas MA, Hanna M. 2011. A framework for variation discovery and  
768 genotyping using next-generation DNA sequencing data. *Nature genetics* 43:491.
- 769 72. McKenna A, Hanna M, Banks E, Sivachenko A, Cibulskis K, Kernysky A, Garimella  
770 K, Altshuler D, Gabriel S, Daly M, DePristo MA. 2010. The Genome Analysis Toolkit:  
771 a MapReduce framework for analyzing next-generation DNA sequencing data.  
772 *Genome Res* 20:1297-303.
- 773 73. Cingolani P. 2017. SnpEff v4.3T- Genomic variant annotations and functional effect  
774 prediction toolbox., <http://snpeff.sourceforge.net/>.
- 775 74. Abyzov A, Urban AE, Snyder M, Gerstein M. 2011. CNVnator: an approach to  
776 discover, genotype, and characterize typical and atypical CNVs from family and  
777 population genome sequencing. *Genome Res* 21:974-84.
- 778 75. Team RDC. 2008. R: A language and environment for statistical computing.  
779 <http://www.R-project.org>.
- 780 76. Garcia-Effron G, Park S, Perlin DS. 2009. Correlating echinocandin MIC and kinetic  
781 inhibition of *fksI* mutant glucan synthases for *Candida albicans*: implications for  
782 interpretive breakpoints. *Antimicrob Agents Chemother* 53:112-122.
- 783 77. Castanheira M, Woosley LN, Diekema DJ, Messer SA, Jones RN, Pfaller MA. 2010.  
784 Low prevalence of *fksI* hot spot 1 mutations in a worldwide collection of *Candida*  
785 strains. *Antimicrob Agents Chemother* 54:2655-2659.
- 786 78. Lackner M, Tscherner M, Schaller M, Kuchler K, Mair C, Sartori B, Istel F, Arendrup  
787 MC, Lass-Flörl C. 2014. Positions and numbers of *FKS* mutations in *Candida albicans*  
788 selectively influence *in vitro* and *in vivo* susceptibilities to echinocandin treatment.  
789 *Antimicrob Agents Chemother* 58:3626-3635.
- 790 79. Kritikos A, Neofytos D, Khanna N, Schreiber PW, Boggian K, Bille J, Schrenzel J,  
791 Mühlethaler K, Zbinden R, Bruderer T. 2018. Accuracy of Sensititre YeastOne  
792 echinocandins epidemiological cut-off values for identification of *FKS* mutant *Candida*  
793 *albicans* and *Candida glabrata*: A ten year national survey of the Fungal Infection  
794 Network of Switzerland (FUNGINOS). *Clinical microbiology and infection* 24:1214.  
795 e1-1214. e4.
- 796 80. Garcia-Effron G, Lee S, Park S, Cleary JD, Perlin DS. 2009. Effect of *Candida glabrata*  
797 *FKS1* and *FKS2* mutations on echinocandin sensitivity and kinetics of 1,3-beta-D-  
798 glucan synthase: implication for the existing susceptibility breakpoint. *Antimicrob*  
799 *Agents Chemother* 53:3690-9.
- 800 81. Zimbeck AJ, Iqbal N, Ahlquist AM, Farley MM, Harrison LH, Chiller T, Lockhart SR.  
801 2010. *FKS* mutations and elevated echinocandin MIC values among *Candida glabrata*  
802 isolates from US population-based surveillance. *Antimicrob Agents Chemother*  
803 54:5042-5047.
- 804 82. Prigent G, Aït-Ammar N, Levesque E, Fekkar A, Costa J-M, El Anbassi S, Foulet F,  
805 Duvoux C, Merle J-C, Dannaoui E. 2017. Echinocandin resistance in *Candida* species  
806 isolates from liver transplant recipients. *Antimicrob Agents Chemother* 61.
- 807 83. Park S, Kelly R, Kahn JN, Robles J, Hsu M-J, Register E, Li W, Vyas V, Fan H,  
808 Abruzzo G. 2005. Specific substitutions in the echinocandin target *Fks1p* account for  
809 reduced susceptibility of rare laboratory and clinical *Candida* sp. isolates. *Antimicrob*  
810 *Agents Chemother* 49:3264-3273.
- 811 84. Martí-Carrizosa M, Sánchez-Reus F, March F, Cantón E, Coll P. 2015. Implication of  
812 *Candida parapsilosis FKS1* and *FKS2* mutations in reduced echinocandin  
813 susceptibility. *Antimicrob Agents Chemother* 59:3570-3573.
- 814 85. Jiménez-Ortigosa C, Moore C, Denning DW, Perlin DS. 2017. Emergence of  
815 echinocandin resistance due to a point mutation in the *FKS1* gene of *Aspergillus*

816 *fumigatus* in a patient with chronic pulmonary aspergillosis. Antimicrob Agents  
817 Chemother 61.  
818  
819

820  
821  
822

823 **Figure 1. Schematic overview of the *in vitro* experimental evolution.** A) The evolution assay: A  
824 single colony is cultured in RPMI-MOPS medium (2% glucose) for 24h at 37°C after which a  
825 standardized inoculum ( $10^6$  cells) is resuspended in medium containing no drug (control), the drug at a  
826 concentration of  $2xMIC_{50}$ ,  $1xMIC_{50}$  and  $0.5xMIC_{50}$  (shown here) of the particular starting strain. Daily,  
827 the culture is re-diluted (1/10) in fresh RPMI-MOPS medium (2% glucose) with a concentration of drug  
828 based on the  $OD_{600}$  of the control culture. All strains were evolved in triplicate. Daily aliquots of  
829 evolving populations were stored in RPMI-MOPS medium containing 25% glycerol at  $-80^{\circ}C$  for later  
830 examination. B) Ancestry of the five evolved strains that were sequenced. WGS was performed on a  
831 single colony. The name of each strain represents the experimental treatment (letter) and day of isolation  
832 (number), respectively.

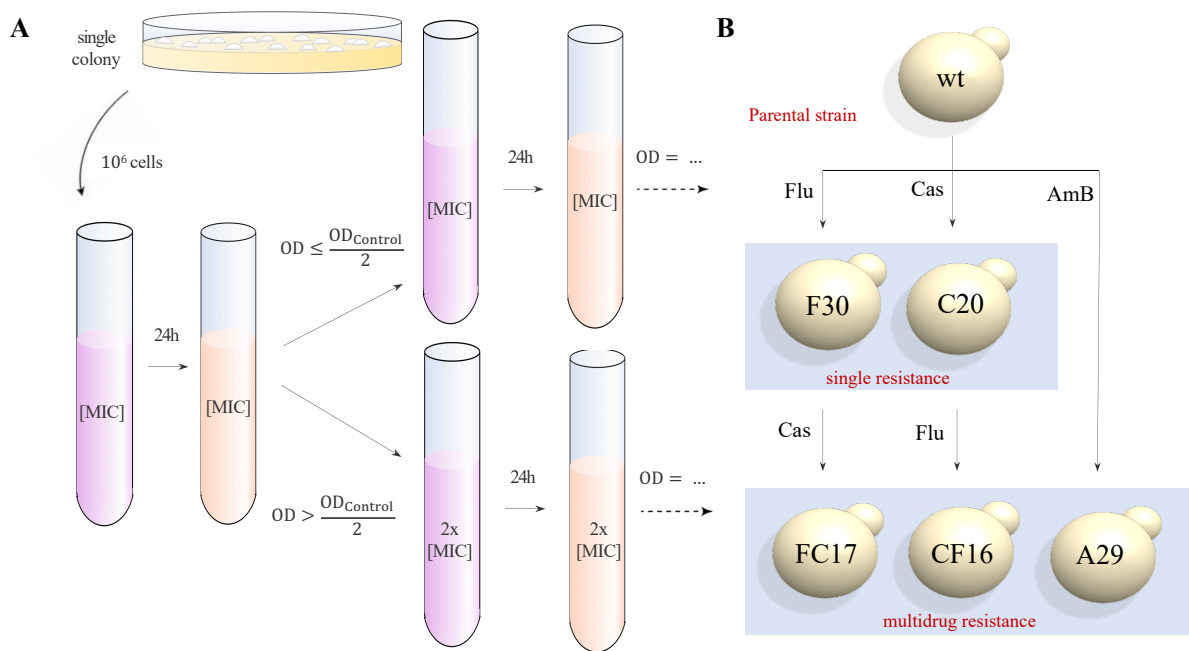

833

834

835

836 **Figure 2. Resistance profiles of evolved strains.** **A)** Summary of MIC<sub>50</sub> values and associated  
837 mutations/CNVs for each end-point strain and divergent intermediate strain. **B-D)** Growth profiles of  
838 evolved strains relative to the wild type strain (wt) in a BDA of fluconazole (**B**), caspofungin (**C**) and  
839 amphotericin B (**D**) respectively. Percentage of growth was calculated from growth without drug and  
840 based on OD<sub>600</sub> measurements after 48h of incubation. Each data point and its standard deviation is  
841 calculated from 3 biological repeats, each represented by the mean of 2 technical repeats. Pdup: partial  
842 duplication, dup: duplication

**A**

| strain | drug        | change                                                                                                                                             | MIC <sub>50</sub> (µg/ml) |                    |                  |
|--------|-------------|----------------------------------------------------------------------------------------------------------------------------------------------------|---------------------------|--------------------|------------------|
|        |             |                                                                                                                                                    | Flu                       | Cas                | AmB              |
| ● wt   | -           | -                                                                                                                                                  | 1                         | 0.125              | 0.5              |
| ■ A21  | AmB         | <i>ERG3</i> <sup>W182*</sup> ; <i>ERG11</i> <sup>E429*</sup>                                                                                       | >64                       | -                  | 2                |
| ▲ A27  | AmB         | <i>ERG3</i> <sup>W182*</sup> ; <i>ERG11</i> <sup>E429*</sup> ; <i>MEC3</i> <sup>A272V</sup>                                                        | >64                       | -                  | 4                |
| ■ A29  | AmB         | <i>ERG3</i> <sup>W182*</sup> ; <i>ERG11</i> <sup>E429*</sup> ; <i>MEC3</i> <sup>A272V</sup> ; <i>FLO8</i> <sup>Q384*</sup>                         | >64                       | 0.125 <sup>†</sup> | 4                |
| ▼ F13  | Flu         | <i>TAC1b</i> <sup>FS191S</sup>                                                                                                                     | 32                        | -                  | -                |
| ▲ F30  | Flu         | <i>TAC1b</i> <sup>FS191S</sup> ; Chr1 <sup>Pdup</sup>                                                                                              | >64                       | 0.125 <sup>†</sup> | 1                |
| ◇ FC16 | (Flu -) Cas | <i>TAC1b</i> <sup>FS191S</sup> ; Chr1 <sup>Pdup</sup> ; <i>FKSI</i> <sup>FL635L</sup> ; <i>CIS2</i> <sup>A27T</sup>                                | >64                       | >64                | -                |
| ▼ FC17 | (Flu -) Cas | <i>TAC1b</i> <sup>FS191S</sup> ; Chr1 <sup>Pdup</sup> ; <i>FKSI</i> <sup>FL635L</sup> ; <i>CIS2</i> <sup>A27T</sup> ; <i>PEA2</i> <sup>D367V</sup> | >64                       | >64                | 1                |
| ▲ C3   | Cas         | <i>FKSI</i> <sup>FL635L</sup>                                                                                                                      | -                         | 64                 | -                |
| ▲ C15  | Cas         | <i>FKSI</i> <sup>FL635L</sup> ; <i>FKSI</i> <sup>M690I</sup>                                                                                       | -                         | 64                 | -                |
| ▲ C20  | Cas         | <i>FKSI</i> <sup>FL635L</sup> ; <i>FKSI</i> <sup>M690I</sup> ; <i>ERG3</i> <sup>L207I</sup>                                                        | 0.5 <sup>†</sup>          | >64                | 0.5 <sup>†</sup> |
| ○ CF16 | (Cas -) Flu | <i>FKSI</i> <sup>FL635L</sup> ; <i>FKSI</i> <sup>M690I</sup> ; <i>ERG3</i> <sup>L207I</sup> ; Chr5 <sup>dup</sup>                                  | 16                        | 64                 | 0.5 <sup>†</sup> |

<sup>†</sup> see BDA graphs in supplementary figure S1

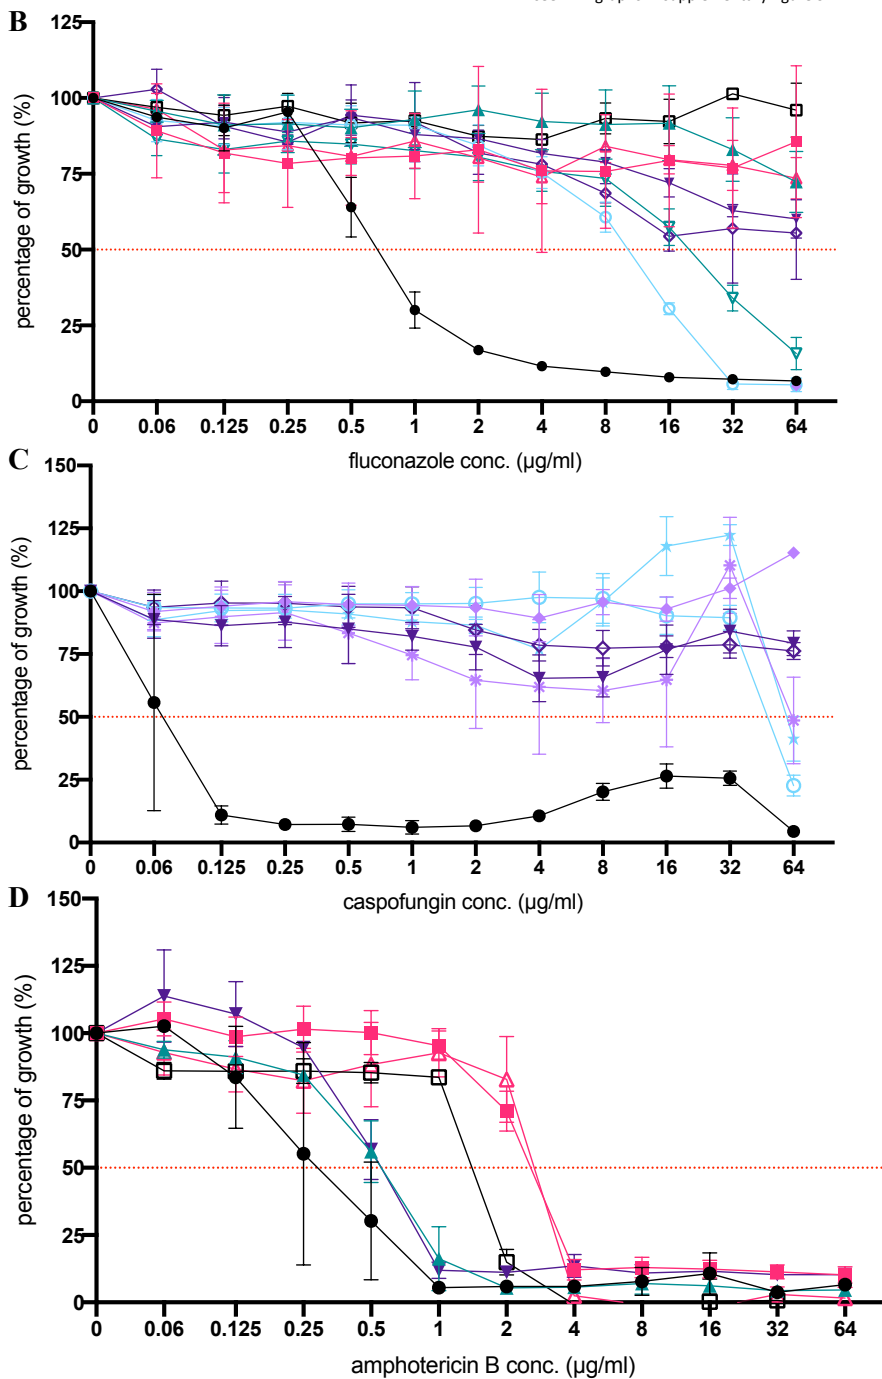



844 **Figure 3. Hotspot (HS) region mutations of the *FKS* genes that confer echinocandin resistance.**  
 845 Amino acid sequence of hotspot 1, 2 and 3 (HS1-3 resp.) of *C. auris* and other fungi are aligned along  
 846 with all mutations found to decrease echinocandin susceptibility as described in literature (references  
 847 are given between brackets). Species specific polymorphisms of HS are indicated in grey, the mutations  
 848 found to confer echinocandin resistance in this study are indicated by a grid. Δ: deletion, \*: nonsense  
 849 mutation

|                                        | HS1                                                                                                                                                                                                               | HS3                                                                                                                           | HS2                                                         | Ref                                                                              |
|----------------------------------------|-------------------------------------------------------------------------------------------------------------------------------------------------------------------------------------------------------------------|-------------------------------------------------------------------------------------------------------------------------------|-------------------------------------------------------------|----------------------------------------------------------------------------------|
| <i>C. auris</i>                        | <sup>635</sup> F L T L S L R D P<br>Δ <sup>1</sup><br>Y <sup>1</sup> P <sup>2</sup><br>L <sup>1</sup> Y <sup>2</sup><br>L <sup>1</sup> F <sup>2</sup>                                                             | <sup>686</sup> L D T Y M W Y I I C N<br>I <sup>1</sup>                                                                        | <sup>1351</sup> W I R R                                     | <sup>1</sup> (20)<br><sup>2</sup> (10)                                           |
| <i>C. albicans</i> <sup>a</sup>        | <sup>641</sup> F L T L S L R D P<br>L <sup>3</sup> P <sup>3</sup> G <sup>5</sup> Y <sup>3</sup> H <sup>3</sup><br>S <sup>3</sup> Y <sup>3</sup> L <sup>5</sup><br>Y <sup>4</sup> F <sup>3</sup>                   | <sup>692</sup> L D T Y M W Y I I C N                                                                                          | <sup>1358</sup> W I R R<br>H <sup>3</sup><br>G <sup>6</sup> | <sup>3</sup> (77)<br><sup>4</sup> (78)<br><sup>5</sup> (79)<br><sup>6</sup> (80) |
| <i>C. glabrata (FKS1)</i>              | <sup>625</sup> F L I L S L R D P<br>S <sup>7</sup> P <sup>7</sup> G <sup>7</sup><br>E <sup>7</sup><br>Y <sup>7</sup>                                                                                              | <sup>676</sup> L D T Y L W Y I V V N                                                                                          | <sup>1341</sup> W V R R                                     | <sup>7</sup> (81)                                                                |
| <i>C. glabrata (FKS2)</i> <sup>b</sup> | <sup>659</sup> F L I L S L R D P<br>Δ <sup>7</sup> W <sup>4</sup> P <sup>7</sup> G <sup>7</sup> T <sup>7</sup><br>V <sup>7</sup> A <sup>9</sup> E <sup>7</sup> H <sup>8</sup><br>S <sup>7</sup><br>Y <sup>8</sup> | <sup>710</sup> L D T Y L W Y I V V N                                                                                          | <sup>1375</sup> W I R R<br>L <sup>8</sup> * <sup>8</sup>    | <sup>8</sup> (82)<br><sup>9</sup> (83)                                           |
| <i>S. cerevisiae</i>                   | <sup>639</sup> F L V L S L R D P<br>I <sup>10</sup> K <sup>10</sup> Y <sup>10</sup>                                                                                                                               | <sup>690</sup> L D T Y L W Y I I V N<br>L <sup>11</sup> N <sup>11</sup> F <sup>11</sup><br>C <sup>11</sup><br>F <sup>11</sup> | <sup>1354</sup> W V R R<br>S <sup>10</sup>                  | <sup>10</sup> (84)<br><sup>11</sup> (29)                                         |
| <i>C. parapsilosis</i> <sup>c</sup>    | <sup>652</sup> F L T L S L R D A <sup>12</sup>                                                                                                                                                                    | <sup>703</sup> L D T Y L W Y I I C N                                                                                          | <sup>1370</sup> W I R R                                     | <sup>12</sup> (85)                                                               |
| <i>C. dubliniensis</i>                 | <sup>641</sup> F L T L S L R D P<br>P <sup>9</sup>                                                                                                                                                                | <sup>692</sup> L D T Y M W Y I I C N                                                                                          | <sup>1358</sup> W I R R                                     | <sup>9</sup> (83)                                                                |
| <i>A. fumigatus</i>                    | <sup>691</sup> F L T L S F K D P<br>S <sup>13</sup>                                                                                                                                                               | <sup>743</sup> L D S Y L W Y I I C N                                                                                          | <sup>1403</sup> W V N R                                     | <sup>13</sup> (86)                                                               |

850

851

<sup>a</sup> Mutations R647G and P649L were exclusively heterozygous.

852

<sup>b</sup> *FKS2* and *FKS1* are functionally redundant in *C. glabrata* and both mutated in echinocandin resistant isolates.

853

<sup>c</sup> The naturally occurring alanine at position 660 allows intrinsic reduced echinocandin susceptibility in *C. parapsilosis*.

854

855

856 **Figure 4. Growth curves of end-point evolved strains.** Growth curves were plotted based on culture  
857 density (spectrophotometric quantification of OD<sub>600</sub> see method section) over 72h of incubation in  
858 RPMI-MOPS medium containing **A)** 0.2% glucose and **B)** 2% glucose at 37°C. Data points are average  
859 values of three biological repeats represented each by the average of two technical repeats.

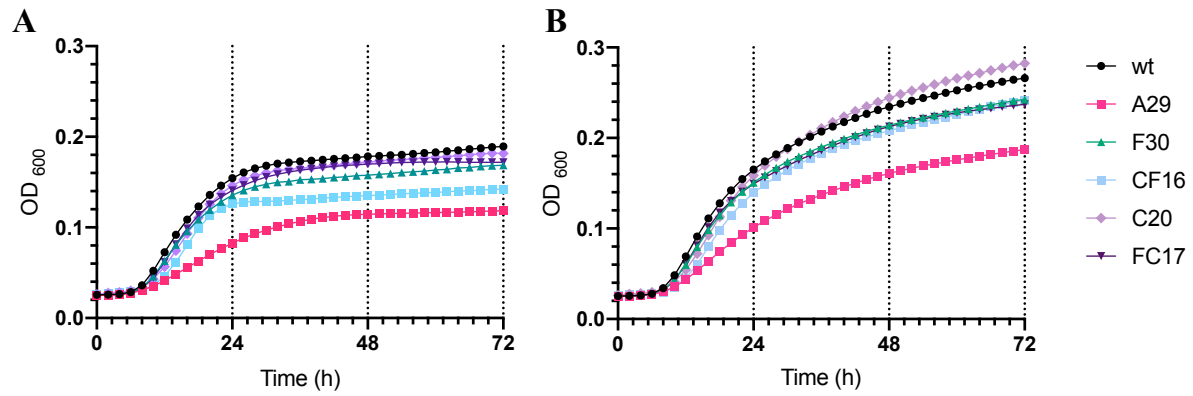

860

861

862

863 **Figure 5. Relative expression of various genes of interest among evolved strains.** Fold  
 864 change of expression levels for *CDR1*, *CDR2*, *ERG11* and *TAC1b* for the wild type (wt), end-  
 865 point evolved strains (A29, F30, FC17, C20, CF16) and intermediate strains F12 and F13 (for  
 866 *CDR1* and *ERG11*). Bars represent  $\log_2$ -transformed means with standard deviation  
 867 accounting for data obtained from 3 biological repeats, each represented by the mean of 2  
 868 technical repeats. Asterisks indicate significant overexpression:  
 869 \* $P \leq 0.05$ ; \*\* $P \leq 0.01$ ; \*\*\* $P \leq 0.001$ ; \*\*\*\* $P \leq 0.0001$

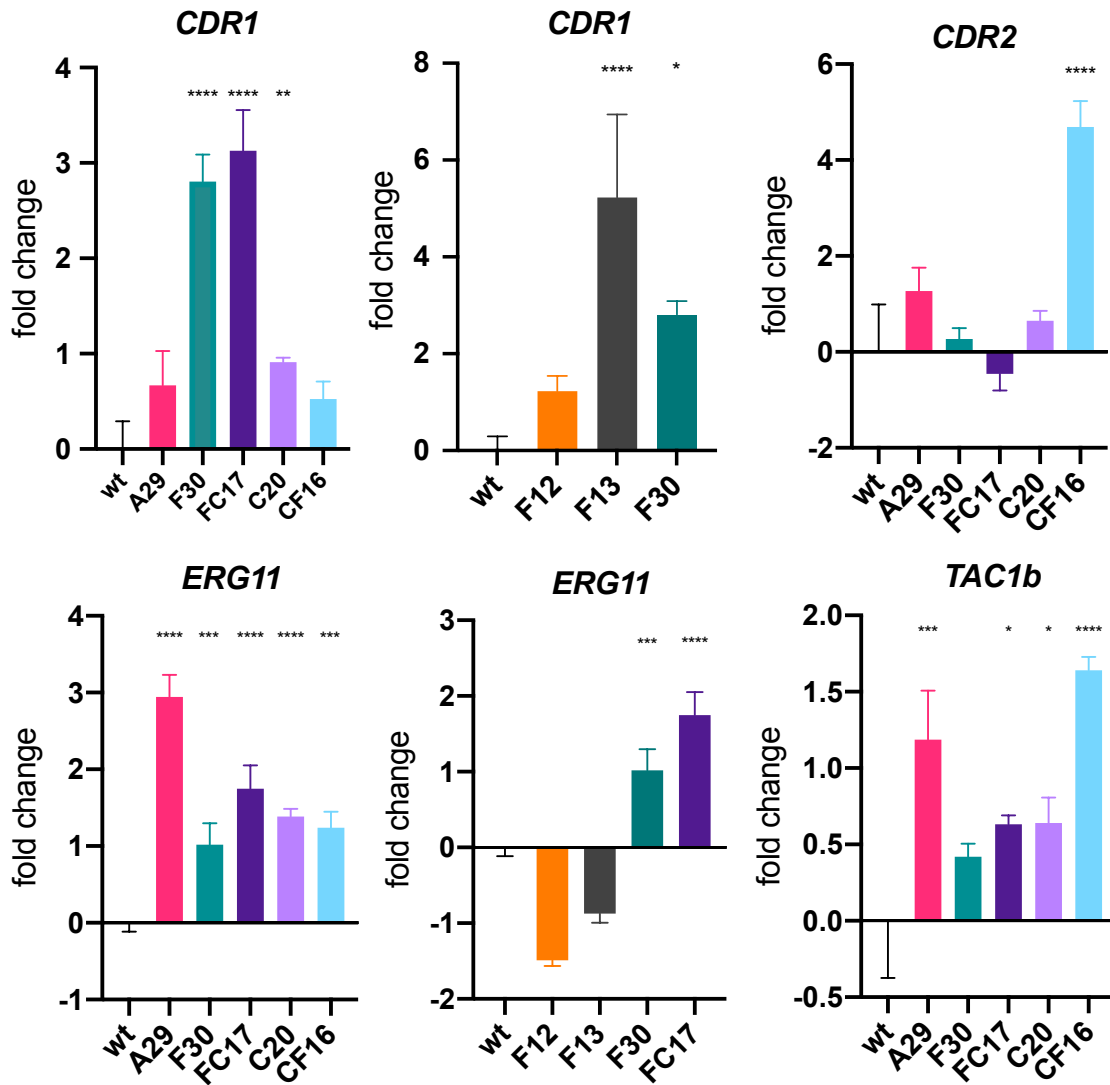

870

871

872 **Figure 6. Coverage plot of whole genome sequencing of end-point evolved strains.** The coverage  
873 displayed is calculated by normalizing the average coverage depth per 5kb window. Each color  
874 represents 1 chromosome (f.l.t.r.: chromosome 1 to 7). Indicated are the significant duplication in  
875 chromosome 1 (Chr1) in strain F30 and FC17 and chromosome 5 (Chr5) in strain CF16. Anomaly's  
876 in Chr5 (spike in all strains) and Chr6 (decreased coverage) are caused by ribosomal DNA (rDNA)  
877 and unambiguous mapping, and can thus be ignored.  
878

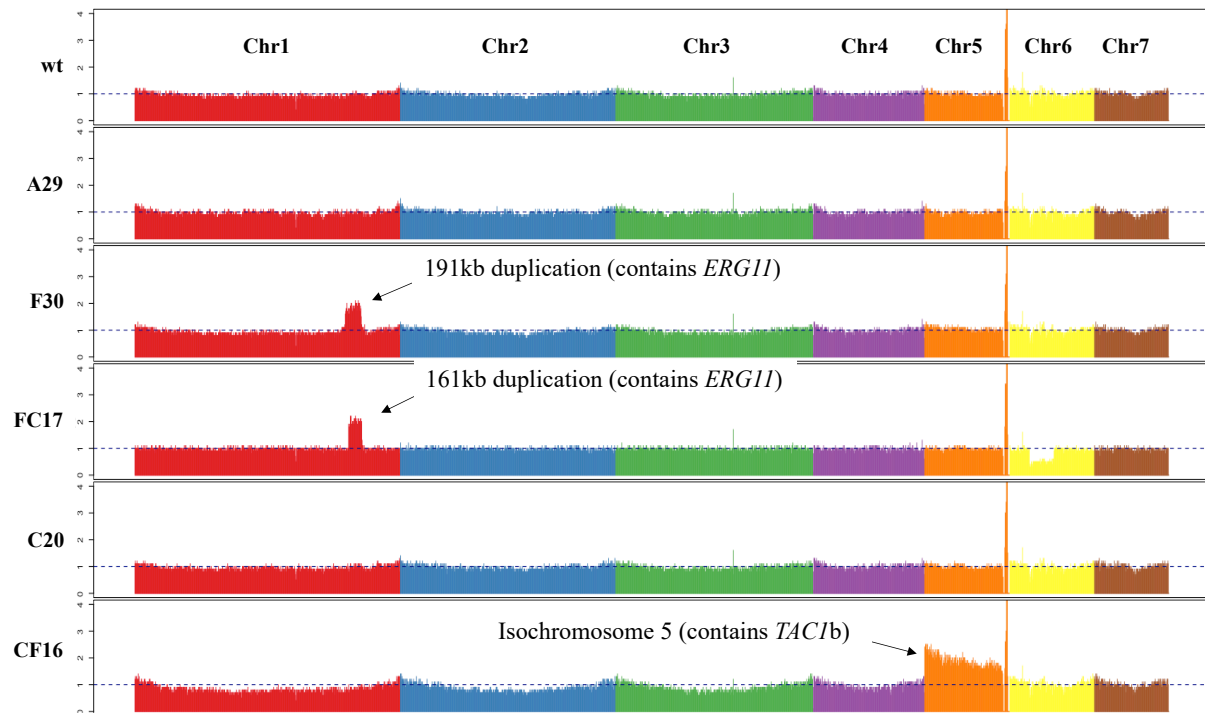

879

880

881

882 **Table 1. All non-synonymous mutations identified in the end-point evolved strains.**

883 Nucleotide and amino acid changes, as compared to the reference parent strain genome (wild

884 type) are displayed. Genes were identified based on orthologues annotated in the *C. auris*

885 B8441 genome sequenced as provided at <http://www.candidagenome.org/>

886

| strain      | change            | type of change | Gene ID (B11220) | Gene ID (B8441) | Ortholog     |
|-------------|-------------------|----------------|------------------|-----------------|--------------|
| <b>A29</b>  | tgG/tgA W182*     | nonsense       | CJI96_002270     | B9J08_003737    | <i>ERG3</i>  |
|             | Gag/Tag E429*     | nonsense       | CJI96_001197     | B9J08_001448    | <i>ERG11</i> |
|             | Cag/Tag Q384*     | nonsense       | CJI96_001121     | B9J08_000401    | <i>FLO8</i>  |
|             | gCg/gTg A272V     | missense       | CJI96_001637     | B9J08_003102    | <i>MEC3</i>  |
| <b>F30</b>  | ttcagt/agt FS191S | codon deletion | CJI96_004335     | B9J08_004820    | <i>TAC1b</i> |
| <b>FC17</b> | ttcagt/agt FS191S | codon deletion | CJI96_004335     | B9J08_004820    | <i>TAC1b</i> |
|             | ttcttg/ttg FL635L | codon deletion | CJI96_001351     | B9J08_000964    | <i>FKS1</i>  |
|             | gAt/gTt D367V     | missense       | CJI96_001286     | B9J08_001356    | <i>PEA2</i>  |
|             | Gca/Aca A27T      | missense       | CJI96_001769     | B9J08_003232    | <i>CIS2</i>  |
| <b>C20</b>  | atG/atA M690I     | missense       | CJI96_001351     | B9J08_000964    | <i>FKS1</i>  |
|             | ttcttg/ttg FL635L | codon deletion | CJI96_001351     | B9J08_000964    | <i>FKS1</i>  |
|             | Cta/Ata L207I     | missense       | CJI96_002270     | B9J08_003737    | <i>ERG3</i>  |
| <b>CF16</b> | atG/atA M690I     | missense       | CJI96_001351     | B9J08_000964    | <i>FKS1</i>  |
|             | ttcttg/ttg FL635L | codon deletion | CJI96_001351     | B9J08_000964    | <i>FKS1</i>  |
|             | Cta/Ata L207I     | missense       | CJI96_002270     | B9J08_003737    | <i>ERG3</i>  |

887

888

889 **Figure S1. Resistance profiles of end-point evolved strains.** A-C) Growth profiles in a BDA of the  
 890 end-point evolved strains (A29, F30, FC17, C20, CF16) and control strain (wt) for fluconazole (A)  
 891 caspofungin (B) and amphotericin B (C) respectively. Percentage of growth was calculated from growth  
 892 without drug and based on OD<sub>600</sub> measurements after 48h of incubation at 37°C. Each data point and  
 893 its standard deviation is calculated from 3 biological repeats, each represented by the mean of 2  
 894 technical repeats. D) Summary of MIC<sub>50</sub> values for each strain and indication of (relatively low ↑/high  
 895 ↑↑) increase or decrease (↓) in MIC in respect to parental strain (wt) MIC.

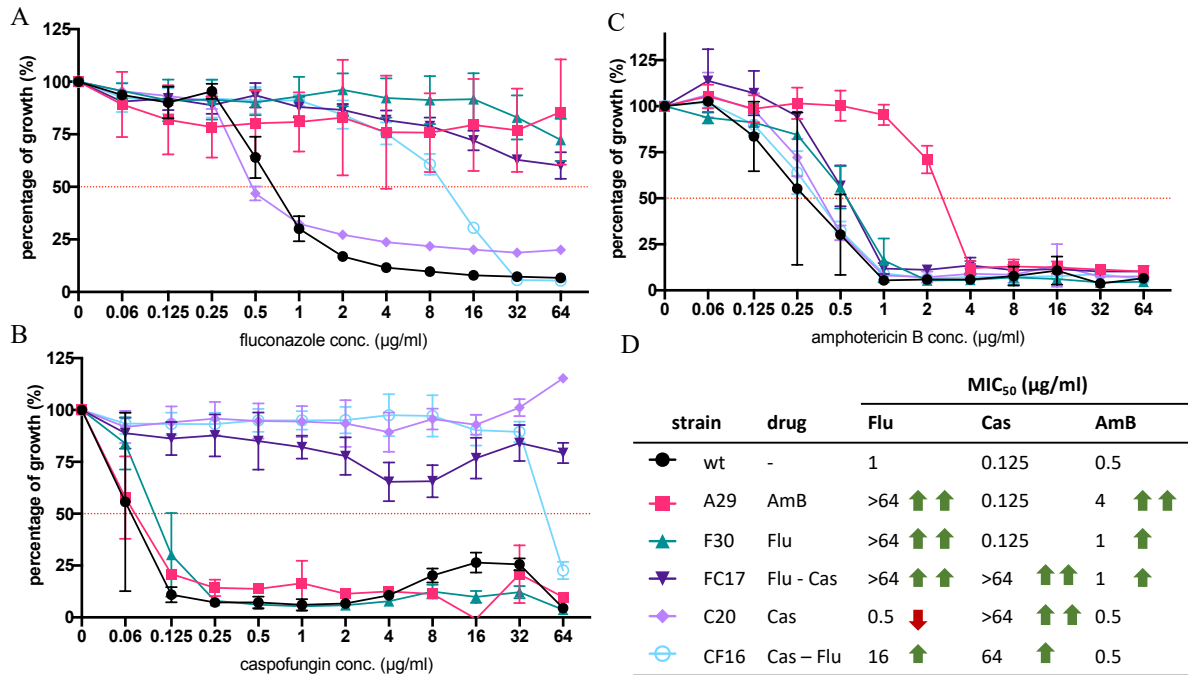

896

897

898



899 **Figure S2. An example of the temperature specificity range of allele-specific primers.** Here a  
 900 temperature gradient PCR was performed using the *MEC3* allele-specific primers (shown in  
 901 supplementary table S1) on gDNA of the wild type strain (wt) and strain A29, containing the  
 902 gCg/gTg|A272V mutation in *MEC3* (see Table 1). Primer pairs ‘WT’ and ‘Δ’ indicate the primers  
 903 targeting the wild type allele (*CauMEC3\_B11220\_PCR/Seq1\_F* and *CauMEC3\_SNP\_A272A\_R*) and  
 904 mutated allele (*CauMEC3\_B11220\_PCR/Seq1\_F* and *CauMEC3\_SNP\_A272V\_R*) respectively and are  
 905 given in supplementary table S1. The green grid indicates a primer specific temperature range (63-64°C  
 906 resp.)

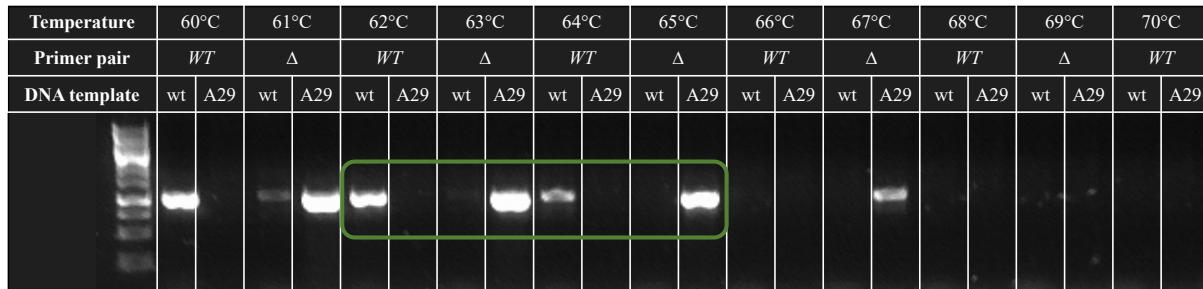

907  
 908  
 909

910 **Figure S3. Copy number variation quantification** of *TAC1b* (marker on the Chr5 duplication  
911 in CF-lineage, see figure 6), *ERG11* (marker on the segmental duplication of Chr1 in F- and  
912 FC-lineage, see figure 6) and *ACT1* (reference) by qPCR on gDNA. CNVs were determined  
913 for 1 biological repeat represented by 3 technical repeats.

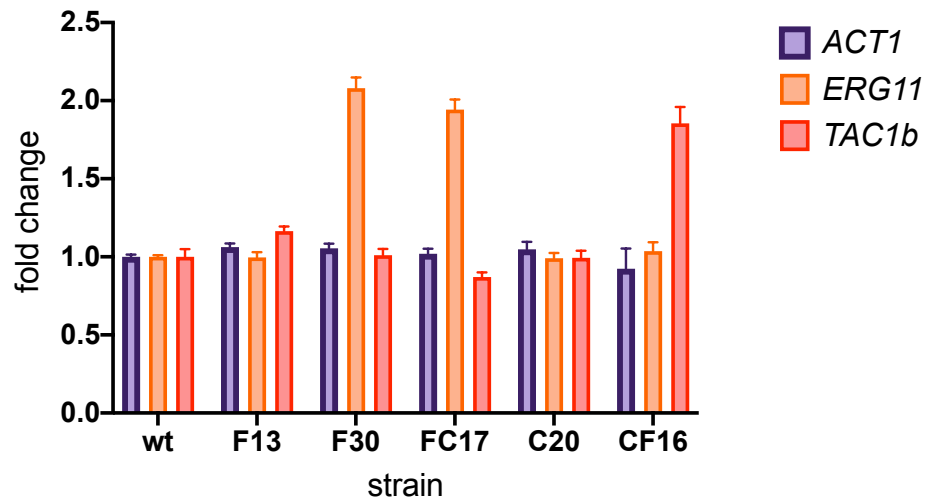

914  
915  
916

917 **Table S1. All primers used in this study.** Primers are arranged per marker. ‘Purpose’ indicates whether  
 918 the primer was used for PCR and sequencing (PCR/seq), CNV or expression analysis (qPCR) or allele-  
 919 specific PCR (AS). Primer pairs for AS-PCR consist of a universal PCR-sequencing primer (indicated  
 920 by ‘PCR/seq/AS’) or universal AS-primer (indicated by ‘AS’) and one allele-specific primer (indicated  
 921 by ‘AS-wt’ for the wild type allele and ‘AS-mt’ for the mutant allele).  
 922

| Marker       | Purpose            | Primer name                | Sequence (5'-3')            |
|--------------|--------------------|----------------------------|-----------------------------|
| <i>TAC1b</i> | PCR/seq/AS         | CauTAC1b_B11220_PCR/Seq3_F | CGCTGCTCAAGTCAGGTAAGG       |
|              | PCR/Seq            | CauTAC1b_B11220_Seq3_R     | AGGTGGCAAAGAAAGTCAACATG     |
|              | AS-wt              | CauTAC1b_SNP_F15F_R        | CAATCCACTCAATACTTTGCGTATTG  |
|              | AS-mt              | CauTAC1b_SNP_F15/R         | TCAATCCACTCAATACTTTGCGTATTA |
|              | qPCR               | CauQ-TAC1B-F1              | CACGCCCAATGGTTTCGC          |
|              | qPCR               | CauQ-TAC1B-R1              | GGGTGAAGGTGCCTCCATG         |
| <i>PEA2</i>  | PCR/seq/AS         | CauPEA2_B11220_PCR/Seq1_F  | TAACACCTCGCCTAACTTGTGGT     |
|              | PCR/seq            | CauPEA2_B11220_Seq1_R      | CTTTTCTCCCACATTGCATC        |
|              | AS-wt              | CauPEA2_SNP_D367D_R        | GCAGAGTACCGTCTAGCATTAAATGA  |
|              | AS-mt              | CauPEA2_SNP_D367V_R        | GCAGAGTACCGTCTAGCATTAAATGT  |
| <i>MEC3</i>  | PCR/seq/AS         | CauMEC3_B11220_PCR/Seq1_F  | CCAATGGGTATCATAAGTCAGCG     |
|              | PCR/seq            | CauMEC3_B11220_Seq1_R      | GTATAACACCTCGACATCA         |
|              | AS-wt              | CauMEC3_SNP_A272A_R        | GTGCTAACGATTTTCGGCG         |
|              | AS-mt              | CauMEC3_SNP_A272V_R        | ACGTGCTAACGATTTTCGGCA       |
| <i>FLO8</i>  | AS                 | CauFLO8_SNP_Seq_R          | GTGGACAGACACAGCTTGCTG       |
|              | AS-wt              | CauFLO8_SNP_Q384Q_F        | GAACATGGGTATGCCTCGGC        |
|              | AS-mt              | CauFLO8_SNP_Q384*_F        | ATGAACATGGGTATGCCTCGGT      |
|              | PCR/seq            | CauFLO8_B11220_Seq1_R      | GTGGACAGACACAGCTTG          |
|              | PCR/seq            | CauFLO8_B11220_Seq1_F      | AGTTCCCTCTTGATCAGA          |
|              | <i>FKS1</i>        | PCR/seq                    | CauFKS1_B11220_Seq2.2_F     |
| PCR/seq      |                    | CauFKS1_B11220_Seq2.2_R    | CGTTCCATTCGCTTATTC          |
| AS           |                    | CauFKS1_B11220_Seq2_F      | CTGCGAAATCAACACCTTTG        |
| AS-wt        |                    | CauFKS1_SNP_M690M_R        | CTTGTCTTCTTGATACTTACGTG     |
| AS-mt        |                    | CauFKS1_SNP_M690I_R        | GTTCTTGTCTTCTTGATACTTACGTA  |
| AS-wt        |                    | CauFKS1_SNP_FL635FL_R      | GTTGGCCGAATCTTACTTCCTC      |
| AS-mt        |                    | CauFKS1_SNP_FL635L_R       | GTTGGCCGAATCTTACTTCCTG      |
| <i>ERG3</i>  |                    | PCR/seq                    | CauERG3_Seq2_F              |
|              | PCR/seq            | CauERG3_B11220_Seq5_R      | TGGAACCATCCGTCAACTG         |
|              | AS <sup>L207</sup> | CauERG3_PCR/Seq4_R         | TACCATTGAATTTGGCTGC         |
|              | AS-wt              | CauERG3_SNP_L207L_F        | CATCTACTTCATCCACCGCTAGC     |
|              | AS-mt              | CauERG3_SNP_L207I_F        | GCATCTACTTCATCCACCGCTAGA    |
|              | AS <sup>W182</sup> | CauERG3_B11220_PCR/Seq1_F  | CTCGTTTAGAGCTCGTTTTTCAG     |
|              | AS-wt              | CauERG3_SNP_W182W'_R       | GGAAGTGAACAATACGGCTCTC      |
|              | AS-mt              | CauERG3_SNP_W182*'_R       | GGAAGTGAACAATACGGCTCTT      |
| <i>ERG11</i> | PCR/seq            | CauERG11_Seq2_F            | AACGAGAGAAGAAAGACCG         |

|             |            |                            |                        |
|-------------|------------|----------------------------|------------------------|
|             | PCR/seq/AS | CauERG11_B11220_PCR/Seq4_R | GCTGGTTTGGTGAAGAATTCGG |
|             | AS-wt      | CauERG11_SNP_E429E_F       | CCCACACAGATGGGGCG      |
|             | AS-mt      | CauERG11_SNP_E429*_F       | GACCCACACAGATGGGGCT    |
|             | qPCR       | CauQ-ERG11-F               | GTTTGCCTACGTGCAATTGG   |
|             | qPCR       | CauQ-ERG11-R               | GTAGTCGACTGGTGAAGCG    |
| <i>CIS2</i> | PCR/seq    | CauCIS2_B11220_Seq3_R      | TTGTCTCGTTCTGCTTCCA    |
|             | PCR/seq    | CauCIS2_B11220_PCR/Seq3_F  | TTTTTTCGCACCCATTTCG    |
|             | AS         | CauCIS2_B11220_Seq2_R      | GCGGTGAGCTGAAAGAGAGC   |
|             | AS-mt      | CauCIS2_SNP_A27T_F         | CGGCCATGGAGAACCA       |
|             | AS-wt      | CauCIS2_SNP_A27A_F         | CGGCCATGGAGAACCG       |
| <i>ACT1</i> | qPCR       | CauQ-ACT1-F                | GAAGGAGATCACTGCTTTAGCC |
|             | qPCR       | CauQ-ACT1-R                | GAGCCACCAATCCACACAG    |
| <i>LSC2</i> | qPCR       | CauQ-LSC2-F                | TGTACCGACATGGAAGGAATTG |
|             | qPCR       | CauQ-LSC2-R                | TCACACCAAGACAGCTTATCC  |
| <i>UBC4</i> | qPCR       | CauQ-UBC4-F                | ACCTCAGCGGTTAACAAGAG   |
|             | qPCR       | CauQ-UBC4-R                | CGAATCGGTGACGATCCATTA  |
| <i>CDR1</i> | qPCR       | CauQ-CDR1-F                | GAAATCTTGCACTTCCAGCCC  |
|             | qPCR       | CauQ-CDR1-R                | CATCAAGCAAGTAGCCACCG   |
| <i>CDR2</i> | qPCR       | CauQ-CDR2-F                | GTCAACGGTAGCTGTGTG     |
|             | qPCR       | CauQ-CDR2-R                | GTCCCTCCACCGAGTATGG    |

923

924

925

926
